# Supplementary material for: Modulation of the superficial electronic structure via metal–support interaction for H2 evolution over Pd catalysts
Source: Royal Society of Chemistry journal article supplement (doi:10.1039/d0sc06795d), 2021-01-01
Supplement: d0sc06795d1.pdf [file d0sc06795d1.pdf]

# Modulation of Superficial Electronic Structure via Metal-Support Interaction for H<sub>2</sub> Evolution over Pd Catalysts

Jin Wang,<sup>a</sup> Dan Cheng,<sup>b,c</sup> Mengmeng Gao,<sup>a</sup> Qian Li,<sup>a</sup> Ying Xin,<sup>a</sup> Nana Zhang,<sup>a</sup> Zhaoliang Zhang,<sup>\* a,d</sup>  
Xuehua Yu,<sup>d</sup> Zhen Zhao,<sup>\*d</sup> and Kebin Zhou,<sup>\*b</sup>

*a School of Chemistry and Chemical Engineering, Shandong Provincial Key Laboratory of Fluorine Chemistry and Chemical Materials, University of Jinan, Jinan 250022, P.R. China. Email: chm\_zhangzl@ujn.edu.cn*

*b School of Chemical Sciences, University of Chinese Academy of Sciences, Beijing 100049, P.R. China. Email: kbzhou@ucas.ac.cn*

*c Department of Biological Sciences, National University of Singapore, 117543, Singapore.*

*d Institute of Catalysis for Energy and Environment, College of Chemistry and Chemical Engineering, Shenyang Normal University, Shenyang 110034, Liaoning, P. R. China. Email: zhenzhao@cup.edu.cn*

## 1. Supplementary Results

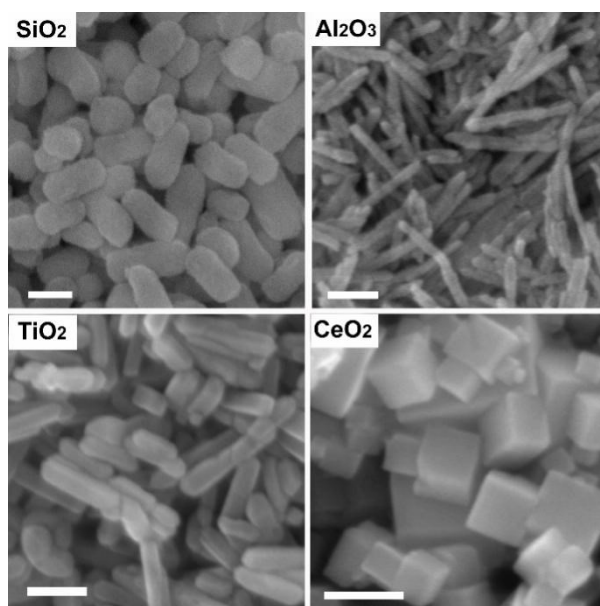

**Figure S1.** SEM images of the four metal oxide supports: SiO<sub>2</sub>, Al<sub>2</sub>O<sub>3</sub>, TiO<sub>2</sub> and CeO<sub>2</sub>.

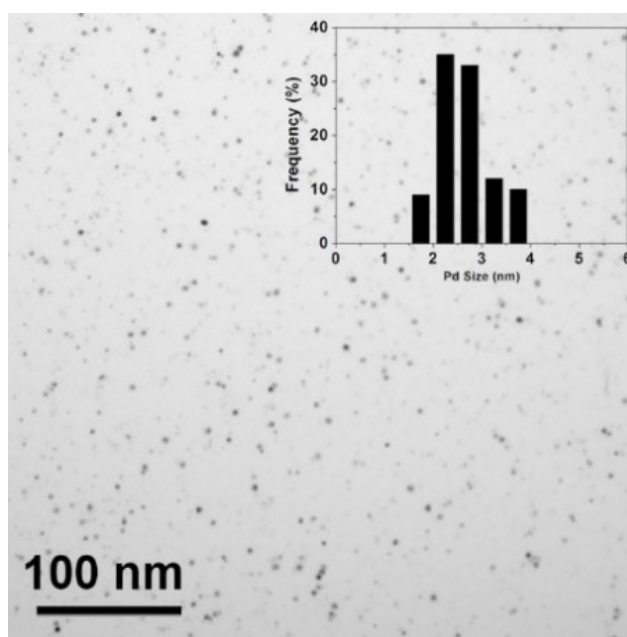

**Figure S2.** TEM images of colloidal Pd nanoparticles and the histogram of the particle-size distributions (inset).

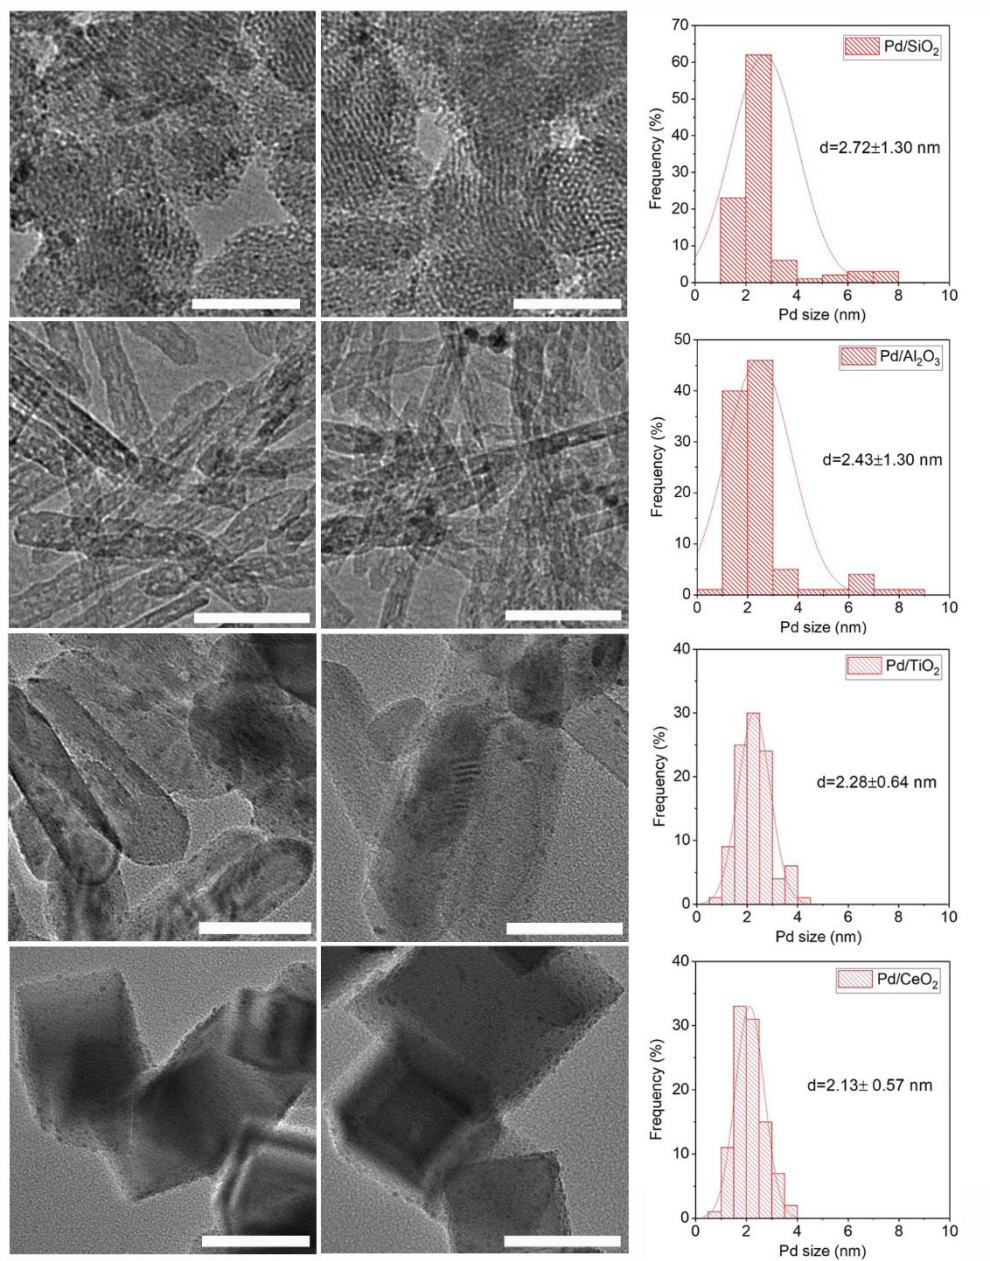

**Figure S3.** The TEM images of Pd/MO<sub>x</sub> catalysts and the corresponding histogram of the particle size distribution. Scale bar is 20 nm.

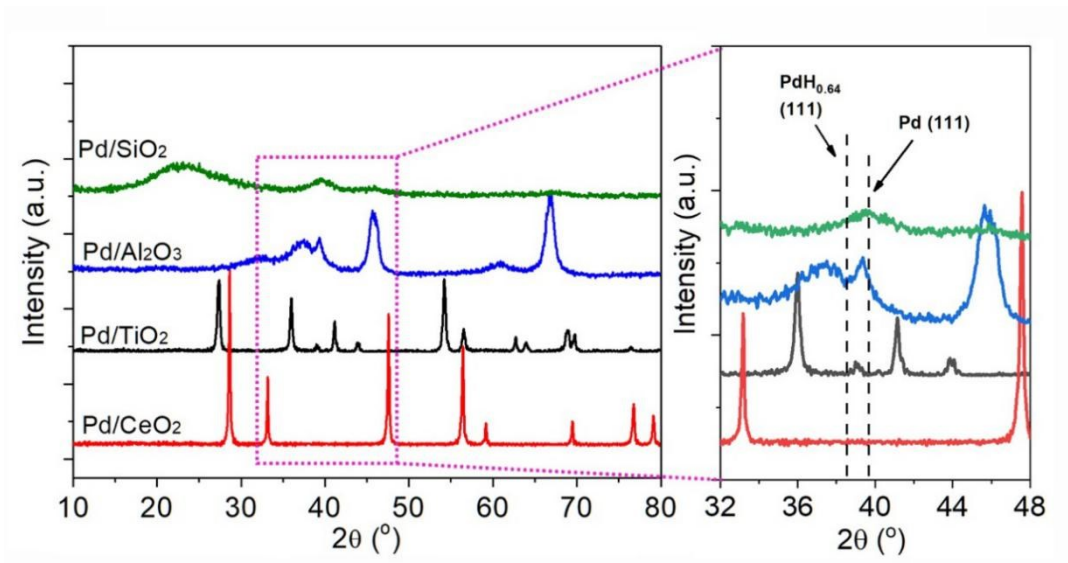

**Figure S4.** XRD patterns of Pd/SiO<sub>2</sub>, Pd/Al<sub>2</sub>O<sub>3</sub>, Pd/TiO<sub>2</sub> and Pd/CeO<sub>2</sub>, as well as enlarged patterns to analyze Pd crystal and PdH<sub>0.64</sub> crystal phases.

**Note:** According to XRD patterns of Pd/MO<sub>x</sub>, peaks of silica, alumina, rutile TiO<sub>2</sub> and ceria were observed. The enlarged patterns do not show Bragg reflections of Pd (JCPDS 87-0641) resulting from the small size of the Pd species except for Pd/SiO<sub>2</sub>, due to the much weak diffraction peaks of SiO<sub>2</sub> nanocrystals. The peaks of Pd (111) and PdH<sub>x</sub> (111) are located at 39.6° and 38.7°, respectively, indicating with dot lines.

**Table S1.** The Pd loading of various Pd/MO<sub>x</sub> catalysts.

| samples              | Pd/SiO <sub>2</sub> | Pd/Al <sub>2</sub> O <sub>3</sub> | Pd/TiO <sub>2</sub> | Pd/CeO <sub>2</sub> |
|----------------------|---------------------|-----------------------------------|---------------------|---------------------|
| Pd loading<br>(wt.%) | 1.71                | 1.70                              | 1.75                | 1.73                |

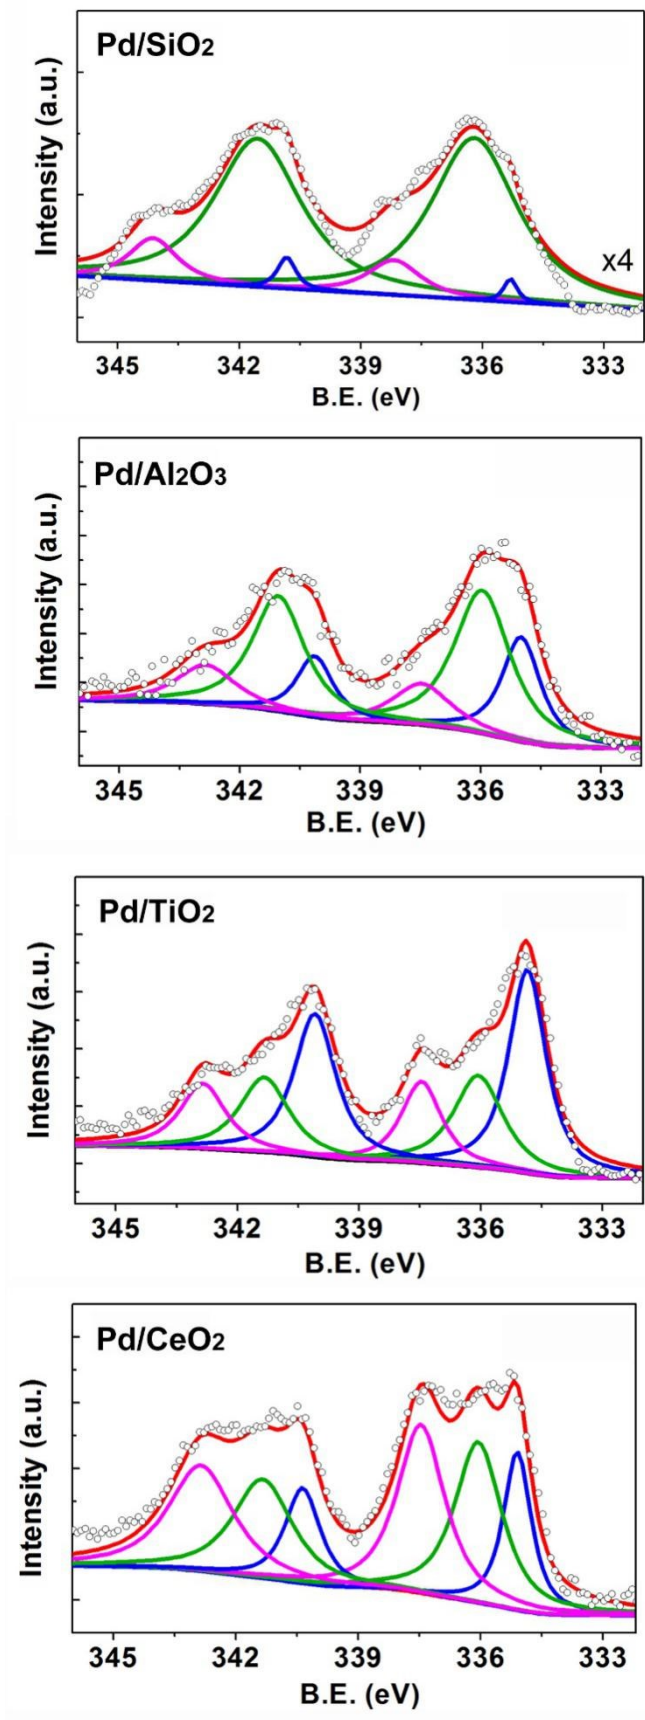

Figure S5. Pd 3d XPS profiles of Pd/MO<sub>x</sub> catalysts.

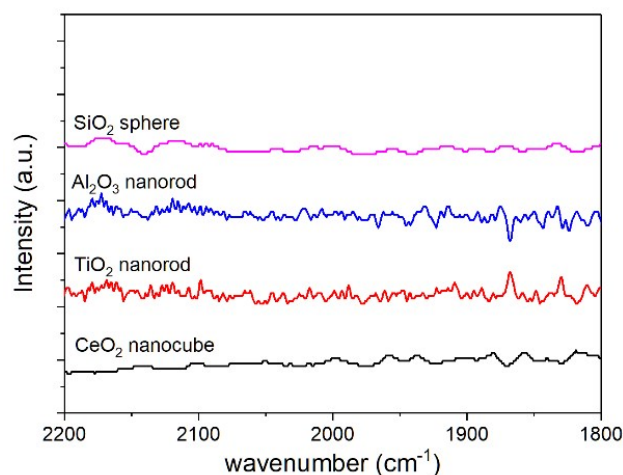

**Figure S6.** In situ DRIFTS spectra of CO chemisorption over  $\text{MO}_x$  at 25 °C. And no CO adsorption bands were observed on pure oxides.

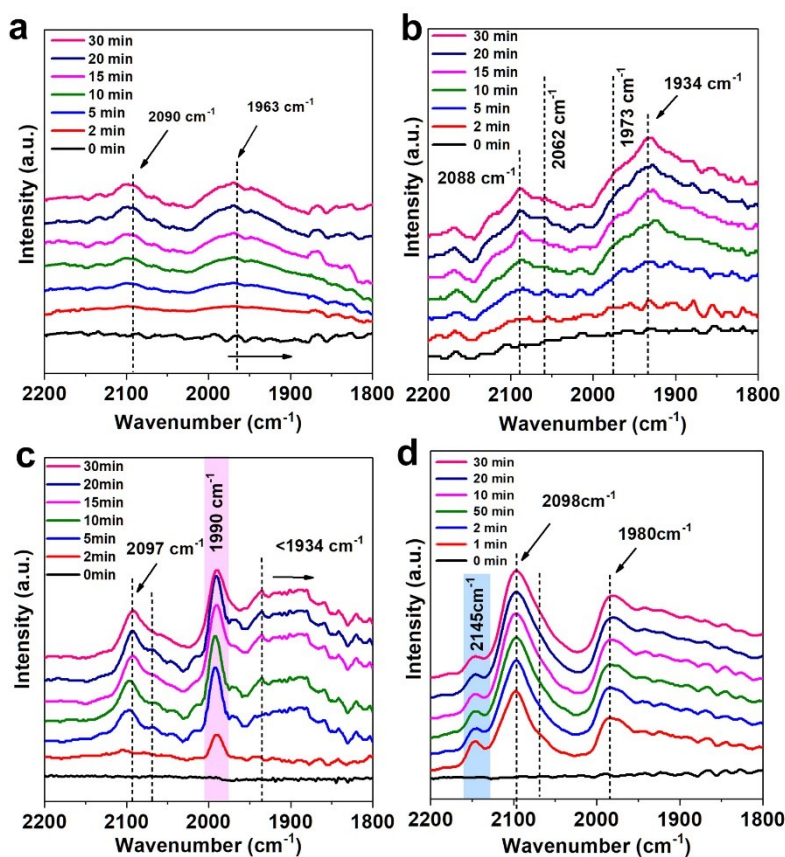

**Figure S7.** In situ DRIFTS spectra of CO chemisorption over  $\text{Pd}/\text{MO}_x$  at 25 °C: (a)  $\text{Pd}/\text{SiO}_2$ ; (b)  $\text{Pd}/\text{Al}_2\text{O}_3$ ; (c)  $\text{Pd}/\text{TiO}_2$ ; (d)  $\text{Pd}/\text{CeO}_2$ . The  $\text{Pd}/\text{MO}_x$  catalysts were pretreated under Ar at 25 °C for 60 min and then collect spectra once exposed to CO/Ar atmosphere. The decreasing of saturated

adsorption time suggests that the CO adsorption strength increase from Pd/SiO<sub>2</sub> (~20min), Pd/Al<sub>2</sub>O<sub>3</sub> (~15min) and Pd/TiO<sub>2</sub> (5min) to Pd/CeO<sub>2</sub>(<2min).

**More details of the CO adsorption structure and additional explanations:**

Both linear and multi-coordinated CO\_Pd<sup>0</sup> bands (CO adsorption on Pd<sup>0</sup> species) present in Pd/SiO<sub>2</sub> and Pd/Al<sub>2</sub>O<sub>3</sub> clearly, because of a large amount of Pd<sup>0</sup> species exposing to surface (86.6% and 63.1%, respectively). As the surface Pd<sup>0</sup> species decreases, the peak intensity declines obviously in Pd/TiO<sub>2</sub>. Even for Pd/CeO<sub>2</sub>, there is not multi-coordinated CO\_Pd<sup>0</sup>, due to the dominant Pd<sup>2+</sup> and Pd<sup>δ-</sup> species on the surface.

For the CO\_Pd<sup>δ-</sup> bands (CO adsorption on Pd<sup>δ-</sup> species), both linear and multi-coordinated CO\_Pd<sup>δ-</sup> present in Pd/Al<sub>2</sub>O<sub>3</sub>, Pd/TiO<sub>2</sub> and Pd/CeO<sub>2</sub>, as the Pd<sup>δ-</sup> species were primarily located on superficial, which is beneficial to the formation of multiple CO adsorption structures. It is generally accepted that the red-shift of the stretching wavenumber of adsorbed CO is indicative of an increasing electron donation from metals into the π\* C=O orbital in the case of CO adsorption on electron-rich metal sites<sup>1,2</sup>. By analogy, the peak at 2066 cm<sup>-1</sup> for Pd/TiO<sub>2</sub> also could be considered as a relative red-shifted peak from 2097 cm<sup>-1</sup>. Furthermore, the red shift of 31 cm<sup>-1</sup> (from 2097 cm<sup>-1</sup> to 2066 cm<sup>-1</sup>) is much larger than that of Ag@Pd NPs (11 cm<sup>-1</sup>)<sup>2</sup>, poly(allylamine)-stabilized Pd (~20 cm<sup>-1</sup>)<sup>1</sup>, and pyridinic-N-tuned Pd (<15 cm<sup>-1</sup>)<sup>3</sup>, demonstrating that TiO<sub>2</sub> as a support promoted superficial Pd atoms to gather more electrons.

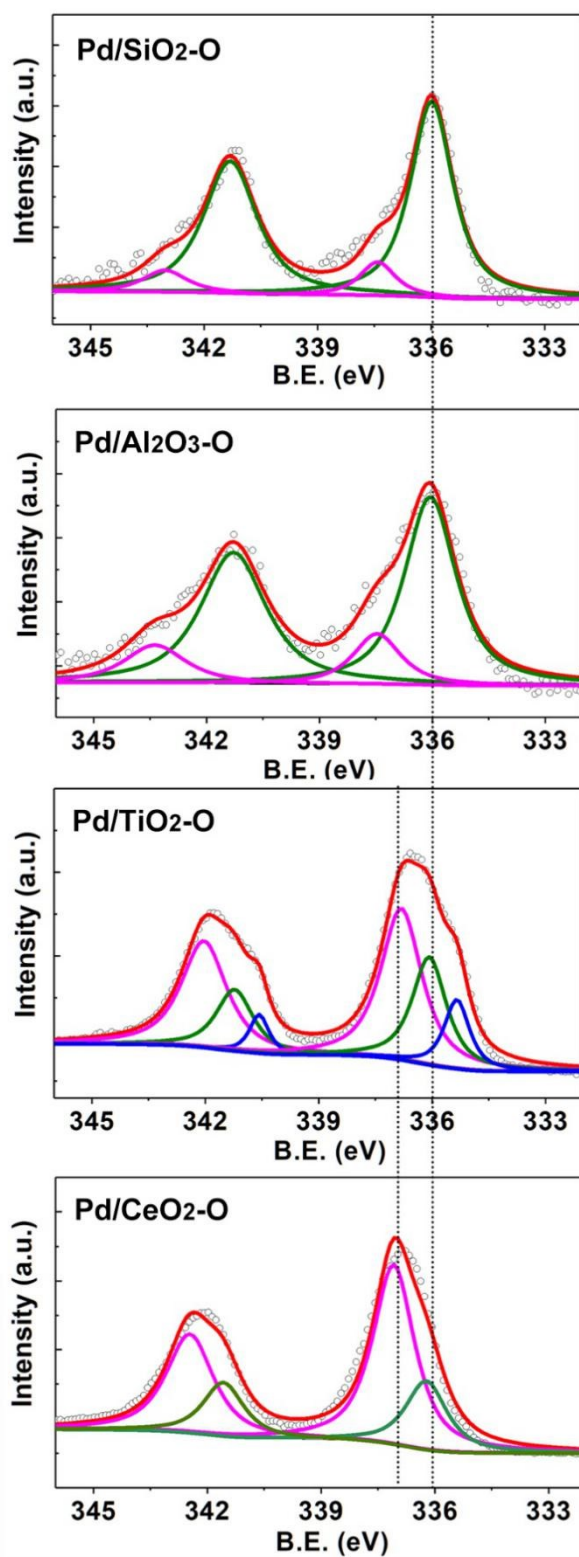

**Figure S8.** Pd 3d XPS profiles of Pd/MO<sub>x</sub> after reoxidation treatment at 300°C under O<sub>2</sub>/N<sub>2</sub> and followed by 5% H<sub>2</sub>/Ar flushing for 30 min at 25 °C (denoted as Pd/MO<sub>x</sub>-O).



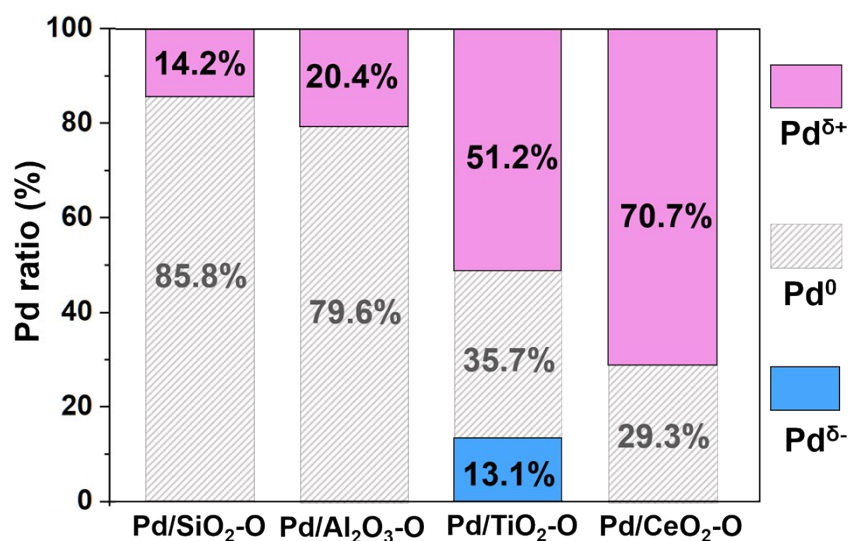

**Figure S9.** The relative proportions of Pd<sup>δ+</sup>, Pd<sup>0</sup> and Pd<sup>δ-</sup> species in Pd/MO<sub>x</sub>-O.

**Note:** The Pd/MO<sub>x</sub> samples were re-oxidized at 300 °C under O<sub>2</sub>/N<sub>2</sub> and followed by 5% H<sub>2</sub>/Ar flushing for 30 min at 25 °C (denotated as Pd/MO<sub>x</sub>-O). As shown in Figure S8 and S9, metallic Pd is the dominant species for Pd/SiO<sub>2</sub>-O and Pd/Al<sub>2</sub>O<sub>3</sub>-O (almost 85.8% and 79.6%, respectively). In the case of Pd/TiO<sub>2</sub>-O, the multi-peak fitting for the asymmetric peak suggests that Pd<sup>0</sup>, Pd<sup>δ-</sup> and Pd<sup>δ+</sup> species coexisted in the sample. Furthermore, the Pd<sup>2+</sup> species in Pd/MO<sub>x</sub> transform into Pd<sup>δ+</sup> species in Pd/MO<sub>x</sub>-O indicating that electrons partly transfer from the supports back to metals under oxidative conditions, and thus the *p*EMSI is weakened. Due to the strong interaction between Pd NPs and CeO<sub>2</sub>, Pd<sup>δ+</sup> species is dominant in Pd/CeO<sub>2</sub>-O. However, in Pd/SiO<sub>2</sub>-O and Pd/Al<sub>2</sub>O<sub>3</sub>-O, the absence of Pd<sup>δ-</sup> species suggests that the *p*EMSI effect almost disappeared, due to the weak interaction between Pd NPs and SiO<sub>2</sub> or Al<sub>2</sub>O<sub>3</sub>.

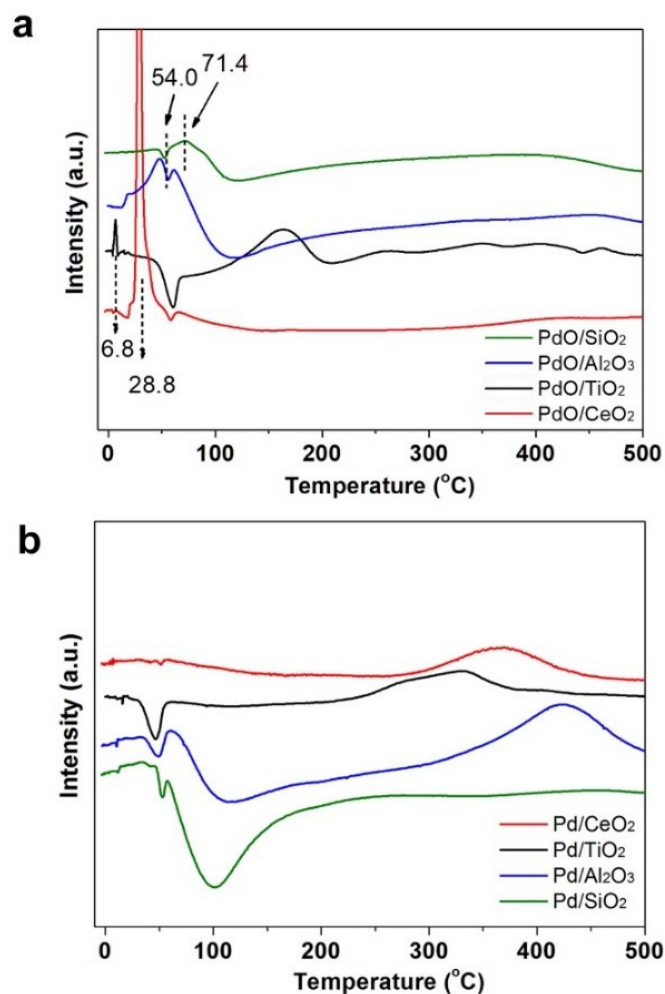

**Figure S10.** H<sub>2</sub>-TPR profiles of (a) PdO/MO<sub>x</sub> and (b) Pd/MO<sub>x</sub>. Obviously, the PdO peaks appeared for PdO/MO<sub>x</sub>, but those peaks were not detected in the Pd/MO<sub>x</sub> catalysts.

**Note:** The PdO/MO<sub>x</sub> samples were prepared by oxidation of the fresh Pd/MO<sub>x</sub> samples under 20% O<sub>2</sub>/N<sub>2</sub> atmosphere at 300 °C for 1 hour and cooling down to room temperature under the same atmosphere. H<sub>2</sub>-TPR profiles were collected from ~0 to 500 °C. It is generally accepted that Pd species are relatively easy to be oxidized in air, so the origin of Pd<sup>2+</sup> species were considered carefully. In comparison with PdO/MO<sub>x</sub> (Figure S10a), the Pd/MO<sub>x</sub> samples (Figure S10b) do not contain PdO species, and thus, all Pd<sup>2+</sup> species in Pd/MO<sub>x</sub> are derived from the charge transfer from Pd atoms to oxide supports.

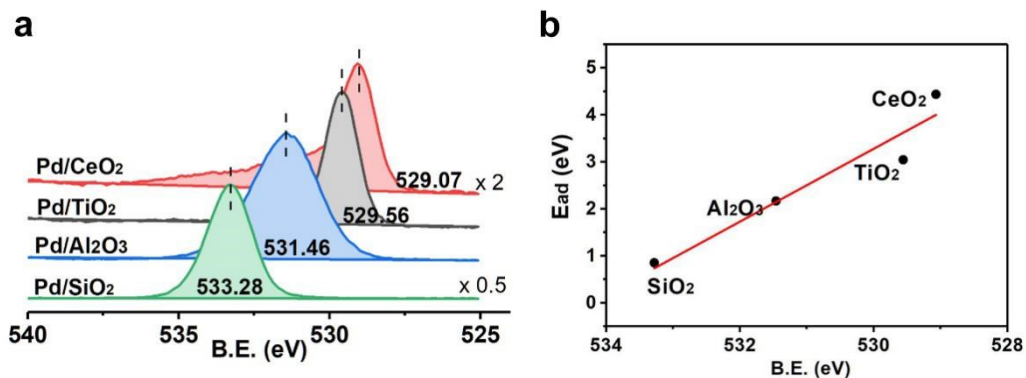

**Figure S11.** (a) O 1s XPS profiles of Pd/MO<sub>x</sub> catalysts. (b) The correlation between adsorption energy ( $E_{ad}$ ) and binding energy of O<sub>1s</sub> (B.E.).

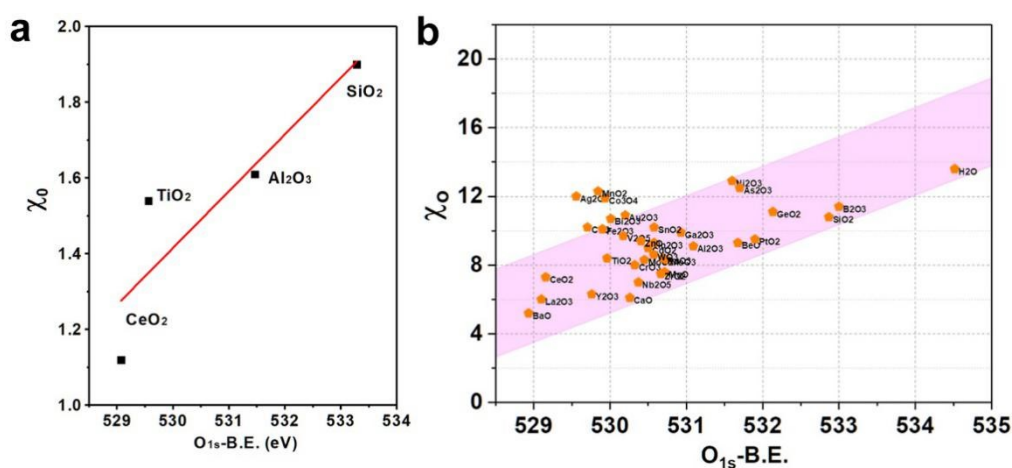

**Figure S12.** The correlation between binding energy of O<sub>1s</sub> (BE) and the electronegativity of the central metal ion ( $\chi_0$ ) according to the table of the electronegativity of atoms coined by Roald Hoffmann<sup>4,5</sup> (a) experimental oxides, the BE of O<sub>1s</sub> obtained from O 1s XPS profiles of Pd/MO<sub>x</sub> catalysts. (b) reference oxides, all data of O<sub>1s</sub> BE were compiled from the NIST X-ray Photoelectron Spectroscopy Database<sup>5</sup> by taking the mean value of O<sub>1s</sub> BE as the input values.

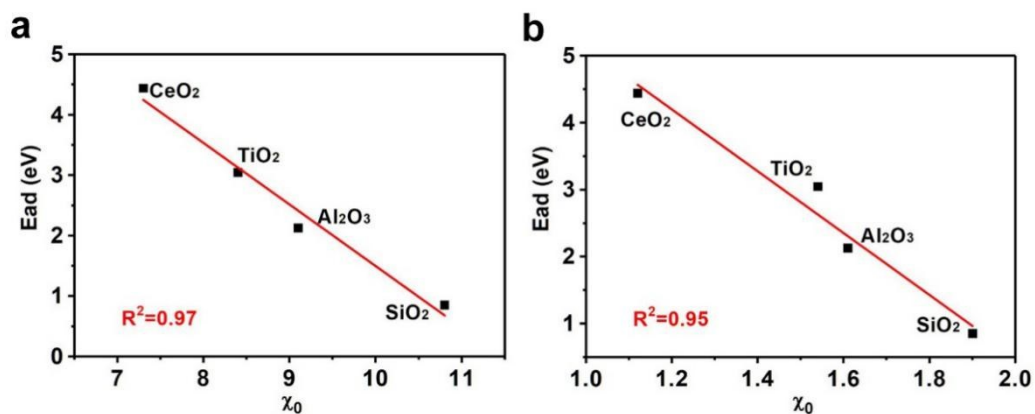

**Figure S13.** (a) The correlations between adsorption energy ( $E_{ad}$ ) and the electronegativity of the central metal ion ( $\chi_0$ ) according to the table of the electronegativity of atoms coined by Roald Hoffmann; (b) The correlation between adsorption energy ( $E_{ad}$ ) and the electronegativity of the central metal ion in Pauling scale ( $\chi_{0-p}$ ).

**Note:** The electronegativity of the central metal ion ( $\chi_0$ ) was introduced as a key factor, and the calculated  $E_{ad}$  was adopted as the descriptor of EMSI based on DFT calculations to better quantitatively describe and understand how to improve the electronic interaction. Surprisingly, the strong correlations among adsorption energy ( $E_{ad}$ ), binding energy of  $O_{1s}$  and the electronegativity of the central metal ion ( $\chi_0$ ) were revealed (Figure S10, S11 and S12)<sup>4</sup>.

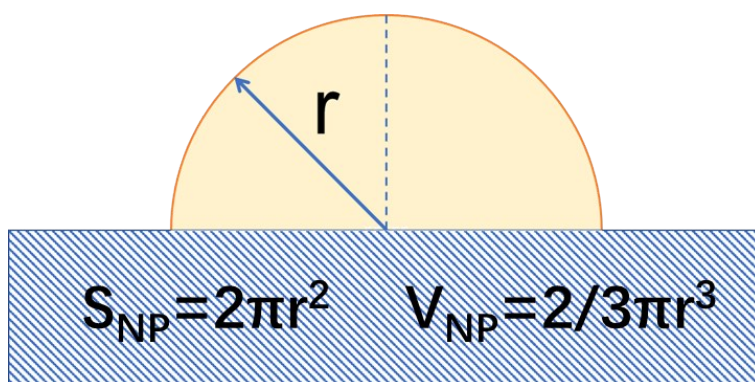

**Figure S14.** The model of supported Pd nanoparticle, the surface area and volume of nanoparticle in order to calculate metal dispersions for Pd/MO<sub>x</sub>.

**Note:** The number of surface Pd atoms were calculated by calculated metal dispersion (D). The calculated dispersion can be expressed as  $D = (S_{NP} \cdot N_s) / (V_{NP} \cdot N_v)^6$ , where  $S_{NP}$  and  $V_{NP}$  represent the surface area and volume of supported Pd nanoparticles, respectively (Figure S14);  $N_s$  (15.25 atoms/nm<sup>2</sup>) and  $N_v$  (67.92 atoms/nm<sup>3</sup>) represent the number of atoms per unit volume and per unit area based on the bulk Pd crystalline structure, respectively. The radii of supported Pd NPs were derived from the histograms of the particle size distributions (Figure S3).

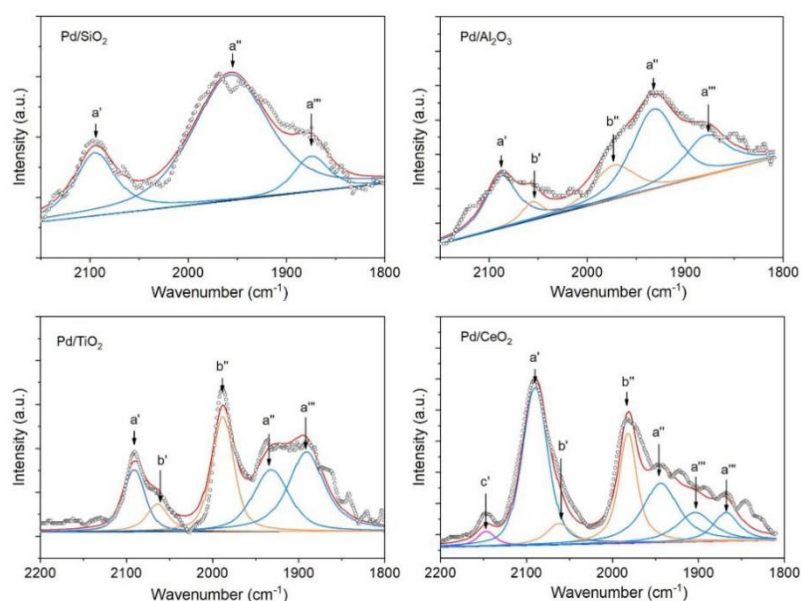

**Figure S15.** DRIFTS spectra of CO adsorption on Pd/MO<sub>x</sub> catalysts at RT and corresponding peak-fitting results in order to calculate the number of surface Pd<sup>δ-</sup> atoms for Pd/MO<sub>x</sub>. The solid lines and scatter data represent the fitted curves and original data, respectively. a', a'' and a''' are the adsorption peaks of linear CO, bridge CO and three-fold CO on Pd<sup>0</sup> atoms, respectively. b' and b'' are the adsorption peaks of linear CO, bridge CO on Pd<sup>δ-</sup> atoms, respectively. c' is the adsorption peak of linear CO on Pd<sup>2+</sup> atoms.

**Note:** Based on the detailed assignment of the C-O stretching vibration characteristic peaks of adsorbed CO (Figure 4), the deconvolution of the DRIFT spectra was performed for a quantitative analysis. The surface concentration (*C*) of the adsorbate is proportional to a simple function of *R* ( $C \propto R$ ,  $R = I_{\text{cat+ads}}/I_{\text{cat}}$ ), where the intensity  $I_{\text{cat+ads}}$  and  $I_{\text{cat}}$  are measured over the catalyst in the presence of the adsorbate and free of adsorbates<sup>7</sup>. Here, we applied the peak area (*A*) as the intensity. As the baseline data, the  $I_{\text{cat}}$  for all peaks are constant in this system, i.e.,  $R = \text{constant} * I_{\text{cat+ads}}$ . So, the surface concentration then is proportional to  $I_{\text{cat+ads}}$  ( $C \propto I_{\text{cat+ads}}$ ). Considering the adsorption structures, a'' and b'' are bridge CO on surface Pd atoms, which results in two surface Pd atoms occupied by a single CO molecule. Similarly a''' means that a single CO molecule occupies three Pd atoms. The areas of a'', b'' and a''' peaks should be multiplied by a coefficient of 2, 2 and 3, respectively, to measure the number of surface Pd atoms.

So, the ratio of surface Pd<sup>δ-</sup> atoms (at%Pd<sup>δ-</sup>) can be expressed as:

$$\text{at\%Pd}^{\delta-} = (A_b + A_{b''} * 2) / (A_{a'} + A_{b'} + A_c + A_{a''} * 2 + A_{b''} * 2 + A_{a'''} * 3 + A_{b'''} * 3)$$

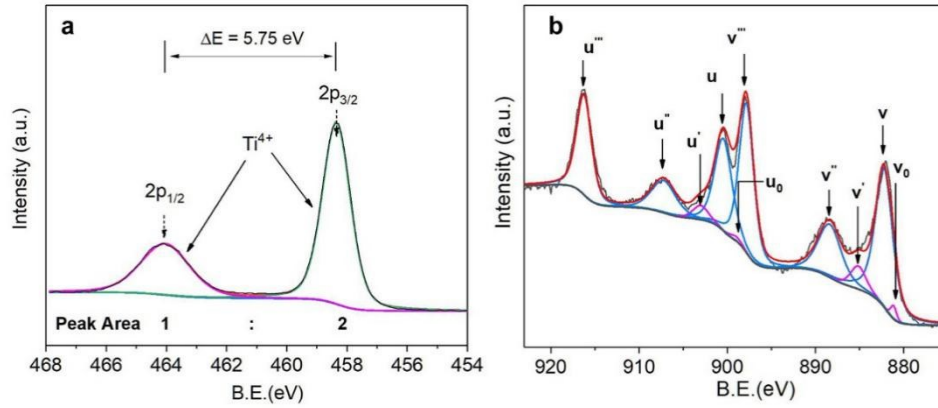

**Figure S16.** XPS spectra and corresponding peak fitting of (a) Ti2p in Pd/TiO<sub>2</sub> and (b) Ce3d in Pd/CeO<sub>2</sub>.

**Table S2.** Intensities (calculated peak areas), inter-component intensity ratios for peaks relevant to Ce<sup>3+</sup> and Ce<sup>4+</sup> species derived from the curve-fitting of the XPS Ce3d spectrum (Figure 5.)  $I_{\text{tot}}\text{Ce}^{3+}$  and  $I_{\text{tot}}\text{Ce}^{4+}$  represent the total intensities of Ce<sup>3+</sup> and Ce<sup>4+</sup> related peaks, respectively. Relative errors are reported, which referred to the theoretical intensity ratio of 1.5 in Ref.[<sup>8,9</sup>].

|                                                         |               |                      |               |
|---------------------------------------------------------|---------------|----------------------|---------------|
| Intensity, $I_{\text{tot}}\text{Ce}^{3+} = 2.53 * 10^4$ |               |                      |               |
| $I_v^o$                                                 | $I_v'$        | $I_u^o$              | $I_u'$        |
| $0.28 * 10^4$                                           | $1.27 * 10^4$ | $0.19 * 10^4$        | $0.78 * 10^4$ |
| Inter-component ratio                                   |               |                      |               |
| $I_v^o / I_u^o$                                         | $I_v' / I_u'$ | $\sum I_v^i / I_u^i$ |               |
| 1.49(0.67%)                                             | 1.63(8.67%)   | 1.60(6.67%)          |               |

| 1.50                                                         |                    | 1.50               |                      | 1.50               |                    |
|--------------------------------------------------------------|--------------------|--------------------|----------------------|--------------------|--------------------|
| Intensity, $I_{\text{tot}}\text{Ce}^{4+} = 34.6 \times 10^4$ |                    |                    |                      |                    |                    |
| $I_v$                                                        | $I_v''$            | $I_v'''$           | $I_u$                | $I_u''$            | $I_u'''$           |
| $8.87 \times 10^4$                                           | $4.32 \times 10^4$ | $7.66 \times 10^4$ | $5.70 \times 10^4$   | $2.81 \times 10^4$ | $5.28 \times 10^4$ |
| Inter-component ratio                                        |                    |                    |                      |                    |                    |
| $I_v/I_u$                                                    | $I_v''/I_u''$      | $I_v'''/I_u'''$    | $\Sigma I_v^j/I_u^i$ |                    |                    |
| 1.55(3.33%)                                                  | 1.54(2.67%)        | 1.45(3.33%)        | 1.51(0.67%)          |                    |                    |
| 1.50                                                         | 1.50               | 1.50               | 1.50                 |                    |                    |

**Note:** Quantitative analysis of XPS spectra (Ti2p and Ce3d) was performed applying peak fitting (Figure S16 and Table S2). The formation of any surface oxygen defects triggers the reduction of  $\text{Ti}^{4+}$  to  $\text{Ti}^{3+}$  and  $\text{Ce}^{4+}$  to  $\text{Ce}^{3+}$ . And the relative concentration of  $\text{Ti}^{3+}$  and  $\text{Ce}^{3+}$  can be calculated by the area of XPS deconvolution peaks. For Pd/TiO<sub>2</sub>, the peak area ratio (1:2) and doublet separation energy for Ti2p XPS peaks (5.75 eV) were determined to agree well with the theoretical values, 1:2 and 5.76 eV, respectively (Figure S16a)<sup>10</sup>, indicating that the only  $\text{Ti}^{4+}$  existed in the Pd/TiO<sub>2</sub> catalysts. Because of the spectral complexity of Ce3d XPS spectra for cerium oxides, inter-component peak intensity ratios are concerned in the peak fitting to evaluate the accurate  $\text{Ce}^{3+}$  percentage (Figure S16b). Theory suggests that each of the two spin-orbit split components of the Ce3d subshell contains 10 electrons, which distributed into  $n_{j+}$  (6-fold degenerate electrons) and  $n_{j-}$  (4-fold degenerate electrons) resulting in their intensity ratio of 6/4 (= 1.5) [8]. That is, each of the XPS Ce3d<sub>5/2</sub> peaks is 1.5 times as intense as the corresponding Ce3d<sub>3/2</sub> peak, and similarly the ratio of the summation of the intensities of Ce3d<sub>5/2</sub> peaks to Ce3d<sub>3/2</sub> peaks is 1.5. As shown in Table S2, the inter-component peak intensity ratios were calculated, and the relative errors are also shown in parenthesis, all of which are within 10%.

Therefore, the at%[Ce<sup>3+</sup>] percentage is:



$$\text{at}\%[\text{Ce}^{3+}] = \frac{I_{\text{tot}}\text{Ce}^{3+}}{I_{\text{tot}}\text{Ce}^{3+} + I_{\text{tot}}\text{Ce}^{4+}} \diamond 100 = \frac{2.53}{2.53 + 36.4} \diamond 100 = 6.5$$

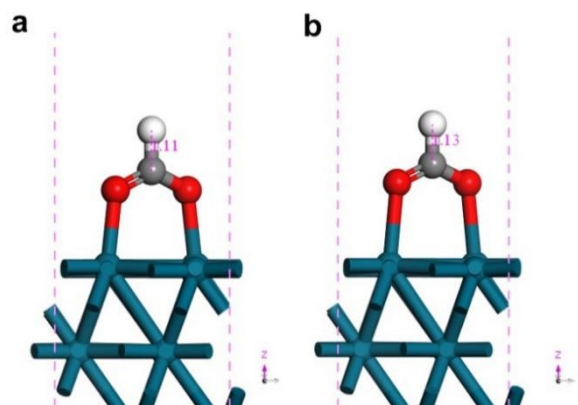

**Figure S17.** The interactions of bridging formate on the surface of Pd(111): (a) neutral HCOO\*-Pd(111), (b) electron-rich HCOO\*-Pd(111) with extra 2e-.

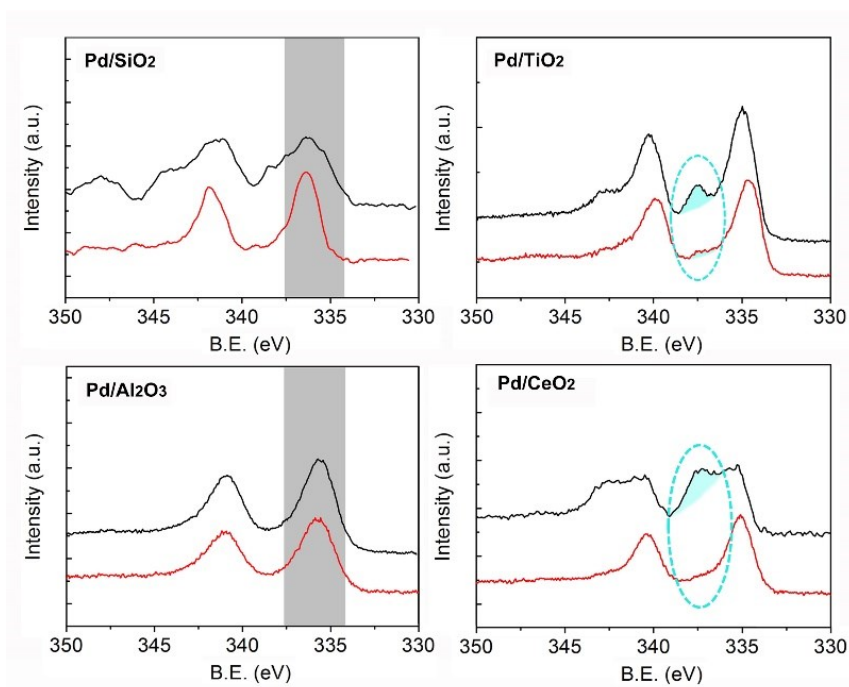

**Figure S18.** Pd 3d XPS profiles for Pd/MO<sub>x</sub> catalysts before (black line) and after (red line) usage.

## 2. References

- 1 Jones, S.; Qu, J.; Tedsree, K.; Gong, X. Q.; Tsang, S. C. *Angew. Chem. Int. Ed.* **2012**, *51* (45), 11275.
- 2 Tedsree, K.; Li, T.; Bagot, P. A. J.; Jones, S.; Marquis, E. A.; Chan, C. A.; George D. W. Smith; Yu, K. M. K.; Tsang, S. C. E. *Nat. Nanotechnol.* **2011**, *6*, 302.
- 3 Bi, Q. Y.; Lin, J. D.; Liu, Y. M.; He, H. Y.; Huang, F. Q.; Cao, Y. *Angew. Chem. Int. Ed.* **2016**, *55* (39), 11849.
- 4 Rahm, M.; Zeng, T.; Hoffmann, R. *J. Am. Chem. Soc.* **2019**, *141*, 342.
- 5 In Version 4.1, DOI:<http://dx.doi.org/10.18434/T4T88K>.
- 6 Anderson, J. R. *Structure of metallic catalysts / J. R. Anderson*; Academic Press: London ; New York, 1975.
- 7 Sirita, J.; Phanichphant, S.; Meunier, F. C. *Anal. Chem.* **2007**, *79* (10), 3912.
- 8 Paparazzo, E. *Applied Catalysis B: Environmental* **2011**, *105* (1-2), 248.
- 9 Anandan, C.; Bera, P. *Appl. Surf. Sci.* **2013**, *283*, 297.
- 10 Georgiadou, I.; Spanos, N.; Papadopoulou, C.; Matralis, H.; Kordulis, C.; Lycourghiotis, A. *Colloids and Surfaces A: Physicochemical and Engineering Aspects* **1995**, *98* (1), 155.

### 3. Appendix

Calculated Cartesian coordinates of all calculated structures:

#### SiO2\_001\_Pd4

1.0

|               |               |               |
|---------------|---------------|---------------|
| 10.0439996719 | 0.0000000000  | 0.0000000000  |
| 5.0219998360  | 8.6983588715  | 0.0000000000  |
| -0.0000048647 | -0.0000028086 | 36.5330009460 |

O Si Pd

80 40 4

Cartesian

|             |             |              |
|-------------|-------------|--------------|
| 4.156377792 | 2.100079536 | 0.487277150  |
| 2.853750706 | 3.254629612 | 6.305084229  |
| 3.173595905 | 3.130198956 | 11.596085548 |
| 4.981562138 | 3.356087208 | 2.671220064  |
| 4.835788727 | 3.683049440 | 8.046174049  |
| 4.809085369 | 3.288883209 | 13.787700653 |
| 0.944426656 | 0.545769453 | 4.309542656  |
| 1.126583934 | 0.784191012 | 9.965509415  |
| 2.716127872 | 1.598966837 | 2.688061714  |
| 3.035526514 | 1.823627710 | 8.514527321  |
| 2.676753998 | 1.776708245 | 13.807428360 |
| 5.961479664 | 4.444069386 | 4.871346951  |
| 6.156001091 | 4.229358673 | 10.252511978 |
| 2.211834431 | 0.339801341 | 0.379870117  |
| 4.873197079 | 1.511896014 | 6.571227074  |
| 4.794054985 | 1.168493032 | 12.249404907 |
| 3.976356983 | 2.218010664 | 16.092933655 |

|              |             |              |
|--------------|-------------|--------------|
| 1.998869419  | 0.444337010 | 15.986767769 |
| 6.490591526  | 3.048199415 | 15.835155487 |
| 6.672274113  | 2.928676367 | 0.630924940  |
| 9.178377151  | 2.100079536 | 0.487277150  |
| 7.875750542  | 3.254629612 | 6.305084229  |
| 8.191794395  | 3.130973339 | 11.587208748 |
| 10.003561974 | 3.356087208 | 2.671220064  |
| 9.857788086  | 3.683049440 | 8.046174049  |
| 9.830181122  | 3.301269531 | 13.774330139 |
| 5.966426373  | 0.545769453 | 4.309542656  |
| 6.149693489  | 0.771447957 | 9.973107338  |
| 7.738128185  | 1.598966837 | 2.688061714  |
| 8.057526588  | 1.823627710 | 8.514527321  |
| 7.681553364  | 1.795157433 | 13.795409203 |
| 10.983479500 | 4.444069386 | 4.871346951  |
| 11.180829048 | 4.230132580 | 10.252621651 |
| 7.233834267  | 0.339801341 | 0.379870117  |
| 9.895196915  | 1.511896014 | 6.571227074  |
| 9.814406395  | 1.173259735 | 12.248639107 |
| 9.006065369  | 2.189819336 | 16.049642563 |
| 6.999731541  | 0.455253482 | 15.980703354 |
| 11.523961067 | 3.042510509 | 15.833804131 |
| 11.694273949 | 2.928676367 | 0.630924940  |
| 6.667377472  | 6.449258804 | 0.487277150  |
| 5.364750385  | 7.603808880 | 6.305084229  |
| 5.684440136  | 7.482083321 | 11.586988449 |
| 7.492561817  | 7.705266953 | 2.671220064  |
| 7.346788406  | 8.032228470 | 8.046174049  |

|              |             |              |
|--------------|-------------|--------------|
| 7.312913895  | 7.640741825 | 13.785471916 |
| 3.455426693  | 4.894948959 | 4.309542656  |
| 3.638658285  | 5.131612778 | 9.972413063  |
| 5.227128029  | 5.948146343 | 2.688061714  |
| 5.546526909  | 6.172807217 | 8.514527321  |
| 5.170342445  | 6.144841194 | 13.793948174 |
| 3.450479746  | 0.094890021 | 4.871346951  |
| 8.667367935  | 8.578372002 | 10.253535271 |
| 4.722834587  | 4.688980579 | 0.379870117  |
| 7.384197235  | 5.861075401 | 6.571227074  |
| 7.302488804  | 5.522030354 | 12.248456001 |
| 6.442756653  | 6.590405464 | 16.074264526 |
| 4.475559235  | 4.797012806 | 15.956007957 |
| 8.981840134  | 7.376980782 | 15.847249031 |
| 9.183273315  | 7.277855396 | 0.630924940  |
| 11.689377785 | 6.449258804 | 0.487277150  |
| 10.386750221 | 7.603808880 | 6.305084229  |
| 10.686843872 | 7.467435837 | 11.601821899 |
| 12.514561653 | 7.705266953 | 2.671220064  |
| 12.368788719 | 8.032228470 | 8.046174049  |
| 12.316945076 | 7.638827801 | 13.792633057 |
| 8.477425575  | 4.894948959 | 4.309542656  |
| 8.658905983  | 5.129986763 | 9.964741707  |
| 10.249128342 | 5.948146343 | 2.688061714  |
| 10.568526268 | 6.172807217 | 8.514527321  |
| 10.192870140 | 6.122791290 | 13.824087143 |
| 8.472478867  | 0.094890021 | 4.871346951  |
| 13.690688133 | 8.581286430 | 10.253023148 |

|              |             |              |
|--------------|-------------|--------------|
| 9.744833946  | 4.688980579 | 0.379870117  |
| 12.406196594 | 5.861075401 | 6.571227074  |
| 12.314533234 | 5.515715122 | 12.255067825 |
| 11.487481117 | 6.582411766 | 16.107437134 |
| 9.557938576  | 4.770161152 | 15.996230125 |
| 14.002001762 | 7.403110504 | 15.836398125 |
| 14.205273628 | 7.277855396 | 0.630924940  |
| 2.674952745  | 1.748691797 | 1.049994946  |
| 3.895885706  | 2.559456587 | 7.349452972  |
| 3.861328602  | 2.352983236 | 12.840728760 |
| 5.138826847  | 3.259196758 | 1.040679097  |
| 4.926992416  | 0.263559848 | 5.522803307  |
| 5.056805611  | 0.154821232 | 11.011740685 |
| 4.949224472  | 3.339672565 | 15.426607132 |
| 2.406993866  | 0.313488573 | 3.652678967  |
| 2.529806137  | 0.448217005 | 9.210737228  |
| 2.525983334  | 1.870824337 | 15.438261986 |
| 7.696952820  | 1.748691797 | 1.049994946  |
| 8.917885780  | 2.559456587 | 7.349452972  |
| 8.876910210  | 2.358324051 | 12.835175514 |
| 10.160825729 | 3.259196758 | 1.040679097  |
| 9.948991776  | 0.263559848 | 5.522803307  |
| 10.080779076 | 0.165233165 | 11.005273819 |
| 9.989403725  | 3.311924934 | 15.409619331 |
| 7.428993702  | 0.313488573 | 3.652678967  |
| 7.551805973  | 0.448217005 | 9.210737228  |
| 7.536664009  | 1.874982119 | 15.426973343 |
| 5.185953140  | 6.097871304 | 1.049994946  |

|              |             |              |
|--------------|-------------|--------------|
| 6.406886101  | 6.908636093 | 7.349452972  |
| 6.366055489  | 6.707355499 | 12.834372520 |
| 7.649827003  | 7.608376026 | 1.040679097  |
| 7.437992573  | 4.612739086 | 5.522803307  |
| 7.568357944  | 4.512577057 | 11.004798889 |
| 7.458827972  | 7.690661430 | 15.419118881 |
| 4.917994022  | 4.662667751 | 3.652678967  |
| 5.040805817  | 4.797396660 | 9.210737228  |
| 4.987747669  | 6.228371620 | 15.417949677 |
| 10.207952499 | 6.097871304 | 1.049994946  |
| 11.428885460 | 6.908636093 | 7.349452972  |
| 11.373637199 | 6.694020748 | 12.848730087 |
| 12.671826363 | 7.608376026 | 1.040679097  |
| 12.459992409 | 4.612739086 | 5.522803307  |
| 12.591406822 | 4.510254383 | 11.011667252 |
| 12.463893890 | 7.693966866 | 15.429968834 |
| 9.939992905  | 4.662667751 | 3.652678967  |
| 10.062806129 | 4.797396660 | 9.210737228  |
| 10.042330742 | 6.221691608 | 15.454445839 |
| 9.002478600  | 4.703731537 | 18.426149368 |
| 6.696613312  | 3.372317314 | 18.550107956 |
| 6.726112843  | 6.027577877 | 18.404924393 |
| 7.513707161  | 4.808059692 | 20.517080307 |

**Al2O3\_110\_Pd4**

1.0

|               |              |              |
|---------------|--------------|--------------|
| 8.4130001068  | 0.0000000000 | 0.0000000000 |
| -0.0830810040 | 8.0675720611 | 0.0000000000 |

-0.0000083582

-0.0000084447

31.3845996857

O Al Pd

54 36 4

Cartesian

|             |             |              |
|-------------|-------------|--------------|
| 3.586626768 | 7.386300564 | 3.084462643  |
| 3.475185156 | 7.316686630 | 8.594333649  |
| 7.764607906 | 5.055858135 | 1.363234043  |
| 7.858466625 | 5.042865276 | 7.026563168  |
| 3.634816647 | 6.819906712 | 31.046518326 |
| 3.509095430 | 6.979537487 | 5.639062405  |
| 3.609799862 | 6.915192604 | 11.127192497 |
| 7.847551346 | 5.230297565 | 4.375734806  |
| 7.739969730 | 5.141276360 | 10.135182381 |
| 7.791420937 | 0.997646034 | 4.283862591  |
| 7.814534187 | 0.918891370 | 9.714748383  |
| 3.707256317 | 3.454153299 | 31.380043030 |
| 3.643911123 | 3.221771717 | 5.814198017  |
| 3.675211668 | 3.180218220 | 11.615566254 |
| 7.826588631 | 1.263450623 | 1.678285122  |
| 7.779827118 | 1.263678312 | 7.152942657  |
| 3.569523096 | 2.988148928 | 2.545871735  |
| 3.651081562 | 2.987327576 | 8.448247910  |
| 5.184673309 | 0.989071906 | 4.284983158  |
| 5.133564949 | 0.914365470 | 9.714937210  |
| 0.795745194 | 3.459688187 | 31.368173599 |
| 0.833327234 | 3.218340635 | 5.813548088  |
| 0.859009624 | 3.193271637 | 11.635623932 |
| 5.133209705 | 1.249322653 | 1.679446340  |



|             |             |              |
|-------------|-------------|--------------|
| 5.150142193 | 1.257222652 | 7.151037216  |
| 0.992791414 | 2.983229160 | 2.514618874  |
| 0.852518022 | 2.985610485 | 8.452035904  |
| 0.817676127 | 7.383386612 | 3.089047909  |
| 0.904438376 | 7.311212540 | 8.598106384  |
| 5.164542198 | 5.049097061 | 1.354506016  |
| 5.019817352 | 5.038904667 | 7.021933556  |
| 0.870002568 | 6.810054779 | 31.035957336 |
| 0.920474291 | 6.976758003 | 5.644272327  |
| 0.785411656 | 6.893731117 | 11.136332512 |
| 5.003284454 | 5.221014500 | 4.367151260  |
| 5.080533028 | 5.140638351 | 10.147761345 |
| 6.417251587 | 7.201321602 | 2.986731052  |
| 6.403200626 | 7.104136467 | 8.556019783  |
| 6.445204735 | 7.382108212 | 0.063161507  |
| 6.416224003 | 7.264731407 | 5.644582748  |
| 6.402105331 | 7.448391438 | 11.192539215 |
| 2.273103237 | 1.209564328 | 4.184901237  |
| 2.261308908 | 1.084185481 | 9.899195671  |
| 2.279778957 | 1.026760340 | 1.215170860  |
| 2.261082172 | 0.979569912 | 7.164696217  |
| 2.258147240 | 5.143971443 | 1.436096549  |
| 2.228295088 | 5.235914230 | 7.052637577  |
| 2.222683907 | 5.145849705 | 4.394016743  |
| 2.216467381 | 5.024976730 | 9.997702599  |
| 6.465786457 | 2.743383408 | 0.164634198  |
| 6.450847626 | 3.024502039 | 5.761845112  |
| 6.474888802 | 2.805603027 | 11.386395454 |

|             |             |              |
|-------------|-------------|--------------|
| 6.469654560 | 3.118436098 | 2.831421137  |
| 6.449110985 | 3.081588984 | 8.448310852  |
| 0.755135894 | 5.255458832 | 0.351209372  |
| 0.741503894 | 5.061497688 | 5.692746162  |
| 0.734768033 | 4.954124451 | 11.196961403 |
| 4.972984314 | 7.064179897 | 4.276961327  |
| 5.022888660 | 6.993644714 | 9.951696396  |
| 5.085659027 | 3.198811769 | 1.342102766  |
| 4.998538971 | 3.207844496 | 7.145146370  |
| 0.797528028 | 1.136452198 | 2.954630852  |
| 0.810383499 | 1.141574502 | 8.497085571  |
| 7.842706203 | 3.205554008 | 1.344999552  |
| 7.907613754 | 3.214948654 | 7.163873672  |
| 3.760489702 | 1.144398689 | 2.973822594  |
| 3.716668129 | 1.146310925 | 8.500176430  |
| 3.757345676 | 5.257863045 | 0.350562841  |
| 3.708260298 | 5.070638180 | 5.705045700  |
| 3.685755730 | 4.916461468 | 11.244527817 |
| 7.854796410 | 7.071671963 | 4.290629387  |
| 7.779335022 | 7.005092621 | 9.954621315  |
| 6.479490757 | 0.963710845 | 0.412776530  |
| 6.478236198 | 1.127420545 | 5.713233471  |
| 6.470347881 | 1.160296082 | 10.993563652 |
| 6.485505581 | 1.180179238 | 3.001732826  |
| 6.466584206 | 1.047617078 | 8.416771889  |
| 6.461200714 | 6.267337322 | 1.385357022  |
| 6.435180664 | 6.089598179 | 7.071716309  |
| 2.247492313 | 7.603466988 | 0.264113963  |

|             |             |              |
|-------------|-------------|--------------|
| 2.201456070 | 7.117156506 | 7.123779774  |
| 2.207314491 | 7.121204376 | 4.245165825  |
| 2.195491314 | 7.181792736 | 10.009132385 |
| 2.246194601 | 2.768836260 | 0.762008667  |
| 2.241756678 | 2.144264698 | 5.745889187  |
| 2.273975611 | 2.375746012 | 11.102028847 |
| 2.275768995 | 4.177021503 | 2.956074476  |
| 2.250195265 | 4.086599350 | 8.436374664  |
| 6.433866501 | 4.158025265 | 4.309102058  |
| 6.411046505 | 3.955878735 | 10.088169098 |
| 3.465080976 | 6.445006847 | 13.261552811 |
| 2.217772722 | 5.780623913 | 15.410660744 |
| 1.840300083 | 4.239013672 | 13.386887550 |
| 0.856233895 | 6.662642956 | 13.380261421 |

### TiO2\_110\_Pd4

1.0

|               |               |               |
|---------------|---------------|---------------|
| 8.8769998550  | 0.0000000000  | 0.0000000000  |
| -0.0000034605 | 12.9937896729 | 0.0000000000  |
| -0.0000077351 | -0.0000077351 | 29.0448207855 |

O Ti Pd

72 36 4

Cartesian

|             |              |              |
|-------------|--------------|--------------|
| 0.000011795 | -0.000007734 | 29.041769028 |
| 8.876978874 | 6.496884346  | 29.041770935 |
| 2.958992243 | -0.000007734 | 29.041753769 |
| 2.958998442 | 6.496886253  | 29.041782379 |
| 5.917977810 | -0.000007734 | 29.041769028 |

|              |              |              |
|--------------|--------------|--------------|
| 5.917997837  | 6.496884346  | 29.041769028 |
| 0.005273876  | 3.281103611  | 3.196702003  |
| 0.005771920  | 9.756334305  | 3.221056223  |
| 2.988711596  | 3.270154953  | 3.218035460  |
| 2.959222317  | 9.759776115  | 3.219990015  |
| 5.892809868  | 3.270953178  | 3.218322992  |
| 5.927707672  | 9.760282516  | 3.219740391  |
| 8.841572762  | 0.059989296  | 6.491363525  |
| 8.871250153  | 6.608335018  | 6.518944263  |
| 2.915585995  | 12.955182076 | 6.484014988  |
| 2.953367472  | 6.652069569  | 6.511393070  |
| 5.914141178  | 12.951030731 | 6.468560219  |
| 5.907949448  | 6.669470310  | 6.489243031  |
| -0.000000684 | -0.000000684 | 2.569206238  |
| -0.000002414 | 6.496893406  | 2.569194317  |
| 2.958996058  | -0.000000684 | 2.569182873  |
| 2.958998919  | 6.496894360  | 2.569206238  |
| 5.917990685  | -0.000000684 | 2.569208860  |
| 5.917998791  | 6.496894360  | 2.569185734  |
| 0.007151583  | 3.221618891  | 5.759959698  |
| 0.009202179  | 9.755033493  | 5.855810642  |
| 2.918358326  | 3.256949186  | 5.818537235  |
| 2.970867395  | 9.752405167  | 5.845304966  |
| 5.977407455  | 3.253937006  | 5.818212032  |
| 5.924060822  | 9.747634888  | 5.845793247  |
| 0.054008797  | 0.032410596  | 9.070581436  |
| 0.048728794  | 6.527718544  | 9.095097542  |
| 3.039794922  | 0.121275119  | 9.068589211  |

|             |              |             |
|-------------|--------------|-------------|
| 2.988826752 | 6.386767387  | 9.087148666 |
| 5.932924271 | 0.112951294  | 9.052605629 |
| 5.944863796 | 6.383657932  | 9.062378883 |
| 1.479498863 | 4.456752300  | 1.050080657 |
| 1.479498148 | 10.953649521 | 1.050077796 |
| 4.438499928 | 4.456756115  | 1.050080657 |
| 4.438505650 | 10.953674316 | 1.050127029 |
| 7.397498131 | 4.456749439  | 1.050071955 |
| 7.397496700 | 10.953687668 | 1.050179362 |
| 1.481321096 | 1.313689113  | 4.499327660 |
| 1.477838755 | 7.844652176  | 4.508900642 |
| 4.438537598 | 1.311802506  | 4.553513527 |
| 4.436897755 | 7.846281528  | 4.491291046 |
| 7.393132687 | 1.314663768  | 4.491679668 |
| 7.401738644 | 7.844736576  | 4.504354954 |
| 1.430698276 | 4.534568310  | 7.861828804 |
| 1.509473681 | 10.998265266 | 8.026260376 |
| 4.462301731 | 4.561931610  | 7.607636929 |
| 4.465259075 | 10.978797913 | 8.026571274 |
| 7.493919849 | 4.530585766  | 7.867994785 |
| 7.414839745 | 10.995962143 | 8.022087097 |
| 1.479498506 | 2.040136576  | 1.050074816 |
| 1.479499459 | 8.537034988  | 1.050077796 |
| 4.438501835 | 2.040138960  | 1.050074816 |
| 4.438497066 | 8.537038803  | 1.050074816 |
| 7.397498608 | 2.040098667  | 1.050176501 |
| 7.397496700 | 8.537038803  | 1.050068974 |
| 1.480198026 | 5.220508575  | 4.553951740 |

|              |              |             |
|--------------|--------------|-------------|
| 1.471672654  | 11.671679497 | 4.530718803 |
| 4.440903664  | 5.222813129  | 4.579154491 |
| 4.437708855  | 11.671064377 | 4.514177799 |
| 7.400137424  | 5.221979141  | 4.553255081 |
| 7.405288696  | 11.670433998 | 4.527117252 |
| 1.511591434  | 2.092144728  | 8.008754730 |
| 1.508498788  | 8.583774567  | 8.074910164 |
| 4.460468292  | 2.040304899  | 7.756601810 |
| 4.458480358  | 8.565526009  | 8.080768585 |
| 7.421572208  | 2.090573788  | 8.016591072 |
| 7.418392181  | 8.579376221  | 8.079536438 |
| -0.000001229 | 3.248436451  | 1.366698265 |
| -0.000002959 | 9.745351791  | 1.366695404 |
| 2.958998442  | 3.248441696  | 1.366695404 |
| 2.958999395  | 9.745344162  | 1.366695404 |
| 5.918002129  | 3.248434067  | 1.366695404 |
| 5.918002129  | 9.745353699  | 1.366698265 |
| 0.015036535  | 12.960426331 | 4.510135174 |
| 0.007154610  | 6.460458755  | 4.483770847 |
| 2.978718996  | 12.970965385 | 4.504064560 |
| 2.960331917  | 6.471531868  | 4.481348515 |
| 5.928092957  | 12.963075638 | 4.488107681 |
| 5.929165840  | 6.464658737  | 4.464970589 |
| 0.025692483  | 3.228867769  | 7.581778526 |
| 0.020959258  | 9.811133385  | 7.708048344 |
| 2.974247217  | 3.393791199  | 7.930763721 |
| 2.976663589  | 9.789230347  | 7.695776939 |
| 5.949520588  | 3.377269745  | 7.924521923 |

|             |              |              |
|-------------|--------------|--------------|
| 5.945818901 | 9.770830154  | 7.697246552  |
| 1.479500055 | -0.000000291 | 1.092294455  |
| 1.479494691 | 6.496891499  | 1.092276931  |
| 4.438509941 | -0.000000291 | 1.092294455  |
| 4.438498497 | 6.496891499  | 1.092279911  |
| 7.397504330 | -0.000000291 | 1.092271090  |
| 7.397509098 | 6.496894360  | 1.092303038  |
| 1.539546728 | 3.193821669  | 4.508502483  |
| 1.488355756 | 9.720085144  | 4.532830715  |
| 4.448624134 | 3.213570833  | 4.714166164  |
| 4.448429585 | 9.713326454  | 4.523495674  |
| 7.357898712 | 3.188255072  | 4.503500938  |
| 7.409200191 | 9.715070724  | 4.534050465  |
| 1.608223557 | 0.075383946  | 7.969324112  |
| 1.553978801 | 6.563497543  | 7.933455944  |
| 4.563691139 | 0.012053546  | 7.858645439  |
| 4.546891212 | 6.576210976  | 7.790886879  |
| 7.520062447 | 0.068807788  | 7.959501266  |
| 7.547746181 | 6.549422741  | 7.938919544  |
| 5.754799843 | 4.650426388  | 10.313879967 |
| 4.462348461 | 2.290805101  | 9.895799637  |
| 3.193104267 | 4.656729698  | 10.330072403 |
| 4.481328011 | 3.309069157  | 12.209053993 |

**CeO2\_100\_Pd4**

1.0

|               |               |              |
|---------------|---------------|--------------|
| 11.6406602859 | 0.0000000000  | 0.0000000000 |
| -0.0000062002 | 11.6406602859 | 0.0000000000 |

-0.0000150368

-0.0000150368

28.2311897278

O Pd Ce

54 4 27

Cartesian

|              |              |             |
|--------------|--------------|-------------|
| 11.640538216 | 0.000934399  | 2.834597826 |
| 0.000335165  | 3.883974791  | 2.834857702 |
| 0.000505381  | 7.761735916  | 2.835230112 |
| 3.879990101  | 0.000582851  | 2.835746765 |
| 3.880111456  | 3.879341841  | 2.835187912 |
| 3.880350351  | 7.762204647  | 2.834075451 |
| 7.761276245  | 0.001398863  | 2.832048416 |
| 7.760268688  | 3.881731749  | 2.832471848 |
| 7.759448528  | 7.761775494  | 2.832017422 |
| 0.055436693  | 0.103070334  | 7.926372051 |
| 0.061633270  | 3.990561724  | 7.929443836 |
| 0.068911277  | 7.869951248  | 7.934516907 |
| 3.915889263  | 11.374185562 | 8.026640892 |
| 4.172091484  | 3.973444462  | 8.056794167 |
| 3.687893629  | 7.743387222  | 8.033198357 |
| 7.759673595  | 11.612403870 | 7.949361324 |
| 7.514908791  | 3.741704464  | 8.002122879 |
| 8.083173752  | 7.815333843  | 7.978286743 |
| 1.918997288  | 1.942014098  | 5.596918106 |
| 1.920999765  | 5.833542824  | 5.614638805 |
| 1.912726998  | 9.695086479  | 5.591486454 |
| 5.853621006  | 1.925180554  | 5.557594776 |
| 5.844498158  | 5.834518433  | 5.578113079 |
| 5.852842808  | 9.688963890  | 5.609232903 |



|              |              |             |
|--------------|--------------|-------------|
| 9.693275452  | 1.944695115  | 5.623859406 |
| 9.699575424  | 5.823544502  | 5.632709503 |
| 9.702073097  | 9.710083008  | 5.607067108 |
| 0.001403722  | 0.001060323  | 0.264396399 |
| 0.001994165  | 3.881085634  | 0.264433086 |
| 0.001968816  | 7.762451172  | 0.265141666 |
| 3.877348900  | 0.001283823  | 0.265745848 |
| 3.878720284  | 3.881487370  | 0.264147967 |
| 3.878720760  | 7.761273861  | 0.264060438 |
| 7.760569572  | 0.000853121  | 0.262310088 |
| 7.760439873  | 3.881053925  | 0.261875361 |
| 7.760780811  | 7.761268139  | 0.262151986 |
| 11.624558449 | 11.640566826 | 5.361577511 |
| 11.624709129 | 3.881902218  | 5.360574722 |
| 11.621519089 | 7.757256508  | 5.361111164 |
| 3.883294106  | 11.595368385 | 5.365554810 |
| 3.871594667  | 3.934543848  | 5.388278008 |
| 3.894294262  | 7.747628689  | 5.397442341 |
| 7.773256302  | 11.633890152 | 5.371449947 |
| 7.781994343  | 3.909987926  | 5.403401375 |
| 7.752559662  | 7.743330479  | 5.401264668 |
| 1.939564466  | 1.941963434  | 2.561661482 |
| 1.940604210  | 5.821379662  | 2.561655760 |
| 1.939992309  | 9.701933861  | 2.562861204 |
| 5.820340157  | 1.941529274  | 2.557440996 |
| 5.819457054  | 5.820868492  | 2.555202246 |
| 5.820469856  | 9.702482224  | 2.557870150 |
| 9.701293945  | 1.943530321  | 2.556173325 |

|             |             |              |
|-------------|-------------|--------------|
| 9.700654984 | 5.821850300 | 2.557443619  |
| 9.700472832 | 9.702004433 | 2.559784174  |
| 7.258338451 | 6.974469185 | 9.670647621  |
| 5.899278164 | 4.740690231 | 9.062799454  |
| 4.664913654 | 7.003130913 | 9.689100266  |
| 5.970375061 | 5.697406769 | 11.487663269 |
| 1.940760136 | 0.002769458 | 4.098869801  |
| 1.940165639 | 3.882886887 | 4.098313332  |
| 1.939546466 | 7.763078213 | 4.098381042  |
| 5.820614338 | 0.002243302 | 4.095010281  |
| 5.820399284 | 3.882557392 | 4.094654560  |
| 5.820059299 | 7.762651443 | 4.094202995  |
| 9.700977325 | 0.003473720 | 4.094982147  |
| 9.700627327 | 3.883723736 | 4.094614983  |
| 9.700263023 | 7.764190197 | 4.095287323  |
| 0.001347410 | 1.941884875 | 1.329203486  |
| 0.001188194 | 5.821822166 | 1.330420136  |
| 0.000927704 | 9.702592850 | 1.330575466  |
| 3.878973722 | 1.942084074 | 1.330310225  |
| 3.878939152 | 5.821653366 | 1.328689575  |
| 3.878876209 | 9.701571465 | 1.330479503  |
| 7.760471821 | 1.941922188 | 1.327139735  |
| 7.760471821 | 5.821761608 | 1.326826453  |
| 7.760714531 | 9.702084541 | 1.327475786  |
| 0.014505394 | 1.970054746 | 6.831778526  |
| 0.013107588 | 5.868490219 | 6.861155987  |
| 0.012918116 | 9.731803894 | 6.860182285  |
| 3.897530794 | 1.858934045 | 6.923213959  |

|             |             |             |
|-------------|-------------|-------------|
| 3.903353453 | 5.799028873 | 6.833986282 |
| 3.870040417 | 9.704613686 | 6.846562862 |
| 7.740246296 | 1.886386275 | 6.828636169 |
| 7.748097420 | 5.812539577 | 6.814670086 |
| 7.782177448 | 9.749215126 | 6.831515789 |

**TiO2\_110\_Pd10**

1.0

|               |               |               |
|---------------|---------------|---------------|
| 11.8360004425 | 0.0000000000  | 0.0000000000  |
| 0.0000000000  | 12.9938001633 | 0.0000000000  |
| 0.0000000000  | 0.0000000000  | 19.0447998047 |

O Ti Pd

96 48 10

Cartesian

|              |              |              |
|--------------|--------------|--------------|
| 2.894967318  | 3.248450041  | 19.042133331 |
| 2.894967318  | 9.745349884  | 19.042133331 |
| 5.853967667  | 3.248450041  | 19.042133331 |
| 5.853967667  | 9.745349884  | 19.042133331 |
| 8.812967300  | 3.248450041  | 19.042133331 |
| 8.812967300  | 9.745349884  | 19.042133331 |
| 11.771967888 | 3.248450041  | 19.042133331 |
| 11.771967888 | 9.745349884  | 19.042133331 |
| 2.893310308  | 0.0000000000 | 3.217809439  |
| 2.893310308  | 6.496900082  | 3.217809439  |
| 5.852310658  | 0.0000000000 | 3.217809439  |
| 5.852428436  | 6.496900082  | 3.217809439  |
| 8.811309814  | 0.0000000000 | 3.217809439  |
| 8.811309814  | 6.496900082  | 3.217809439  |

|              |             |             |
|--------------|-------------|-------------|
| 11.770310402 | 0.000000000 | 3.217809439 |
| 11.770310402 | 6.496900082 | 3.217809439 |
| 2.900317192  | 3.146367550 | 6.512630939 |
| 2.933832169  | 9.726785660 | 6.517506599 |
| 5.873107433  | 3.086225271 | 6.473622799 |
| 5.885790825  | 9.718057632 | 6.523687840 |
| 8.809265137  | 3.104153633 | 6.508354187 |
| 8.813790321  | 9.717393875 | 6.556962490 |
| 11.792618752 | 3.155513763 | 6.522076607 |
| 11.776374817 | 9.730433464 | 6.533092499 |
| 2.899346590  | 3.248450041 | 2.571429014 |
| 2.899346590  | 9.745349884 | 2.571429014 |
| 5.858346939  | 3.248450041 | 2.571429014 |
| 5.858346939  | 9.745349884 | 2.571429014 |
| 8.817346573  | 3.248450041 | 2.571429014 |
| 8.817346573  | 9.745349884 | 2.571429014 |
| 11.776347160 | 3.248450041 | 2.571429014 |
| 11.776347160 | 9.745349884 | 2.571429014 |
| 2.888254404  | 0.007934487 | 5.865884781 |
| 2.877806902  | 6.519889832 | 5.788609028 |
| 5.846935749  | 0.003530193 | 5.863798141 |
| 5.818570137  | 6.537996769 | 5.856875896 |
| 8.803557396  | 0.001050091 | 5.861399651 |
| 8.830057144  | 6.536348820 | 5.854645729 |
| 11.764815331 | 0.008970034 | 5.863209248 |
| 11.777760506 | 6.521226883 | 5.784391880 |
| 2.846042871  | 3.225285530 | 9.101829529 |
| 2.828528404  | 9.720665932 | 9.119963646 |

|              |              |             |
|--------------|--------------|-------------|
| 5.839223385  | 3.284593582  | 9.062509537 |
| 5.807699203  | 9.771639824  | 9.109596252 |
| 8.775490761  | 3.289512396  | 9.092800140 |
| 8.806850433  | 9.792023659  | 9.137001038 |
| 11.709013939 | 3.221838474  | 9.098253250 |
| 11.719627380 | 9.710441589  | 9.120356560 |
| 1.416650891  | 1.208163500  | 1.045178652 |
| 1.416650891  | 7.705063820  | 1.045178652 |
| 4.375650883  | 1.208163500  | 1.045178652 |
| 4.375650883  | 7.705063820  | 1.045178652 |
| 7.334650993  | 1.208163500  | 1.045178652 |
| 7.334650993  | 7.705063820  | 1.045178652 |
| 10.293651581 | 1.208163500  | 1.045178652 |
| 10.293651581 | 7.705063820  | 1.045178652 |
| 1.417096734  | 4.552315235  | 4.556488514 |
| 1.417591095  | 11.062950134 | 4.551582813 |
| 4.376470566  | 4.548542023  | 4.560978889 |
| 4.386511803  | 11.060882568 | 4.544958115 |
| 7.335274696  | 4.550848484  | 4.567788124 |
| 7.339532375  | 11.053237915 | 4.545472622 |
| 10.293399811 | 4.548766613  | 4.565907955 |
| 10.287585258 | 11.058747292 | 4.552458763 |
| 1.392178893  | 1.168568611  | 8.084391594 |
| 1.391452193  | 7.679746628  | 7.976275444 |
| 4.359755993  | 1.164961100  | 8.084866524 |
| 4.275166988  | 7.663680553  | 8.098743439 |
| 7.314738274  | 1.163854957  | 8.079939842 |
| 7.318763733  | 7.680395126  | 8.008436203 |

|              |              |             |
|--------------|--------------|-------------|
| 10.259072304 | 1.161613464  | 8.079004288 |
| 10.336583138 | 7.665186882  | 8.079372406 |
| 1.416650891  | 5.288736343  | 1.045178652 |
| 1.416650891  | 11.785635948 | 1.045178652 |
| 4.375650883  | 5.288736343  | 1.045178652 |
| 4.375650883  | 11.785635948 | 1.045178652 |
| 7.334650993  | 5.288736343  | 1.045178652 |
| 7.334650993  | 11.785635948 | 1.045178652 |
| 10.293651581 | 5.288736343  | 1.045178652 |
| 10.293651581 | 11.785635948 | 1.045178652 |
| 1.419451833  | 1.930418015  | 4.516269207 |
| 1.421558976  | 8.448934555  | 4.524348736 |
| 4.376847744  | 1.928051829  | 4.505270004 |
| 4.375756264  | 8.450948715  | 4.522732258 |
| 7.340903759  | 1.923924327  | 4.496736050 |
| 7.339138508  | 8.445982933  | 4.535691261 |
| 10.299178123 | 1.929283023  | 4.516583443 |
| 10.302226067 | 8.451000214  | 4.533351421 |
| 1.389260292  | 5.238205910  | 7.992523670 |
| 1.391728878  | 11.742914200 | 8.006923676 |
| 4.289395332  | 5.189407349  | 7.817074299 |
| 4.344908237  | 11.744339943 | 8.016163826 |
| 7.308962345  | 5.178331375  | 7.675634861 |
| 7.308944225  | 11.738012314 | 8.000772476 |
| 10.332495689 | 5.186341763  | 7.794103622 |
| 10.281278610 | 11.745106697 | 8.005571365 |
| 2.894138813  | 0.000000000  | 1.364369512 |
| 2.894138813  | 6.496900082  | 1.364369512 |

|              |              |             |
|--------------|--------------|-------------|
| 5.853138924  | 0.000000000  | 1.364369512 |
| 5.853138924  | 6.496900082  | 1.364369512 |
| 8.812139511  | 0.000000000  | 1.364369512 |
| 8.812139511  | 6.496900082  | 1.364369512 |
| 11.771139145 | 0.000000000  | 1.364369512 |
| 11.771139145 | 6.496900082  | 1.364369512 |
| 2.882038355  | 3.319206715  | 4.495682240 |
| 2.892946243  | 9.825197220  | 4.495334625 |
| 5.838744164  | 3.309454441  | 4.459149361 |
| 5.851177216  | 9.796693802  | 4.456585407 |
| 8.808558464  | 3.301592112  | 4.479172230 |
| 8.797253609  | 9.787002563  | 4.467169285 |
| 11.766772270 | 3.316953659  | 4.496953487 |
| 11.754980087 | 9.819241524  | 4.496152878 |
| 2.863385677  | 12.959211349 | 7.702366352 |
| 2.850168467  | 6.451442719  | 7.628936291 |
| 5.826129913  | 12.954451561 | 7.698271275 |
| 5.817478180  | 6.323313236  | 8.078861237 |
| 8.789553642  | 12.939639091 | 7.694103241 |
| 8.796832085  | 6.319603443  | 8.065596581 |
| 11.756849289 | 12.963302612 | 7.698436260 |
| 11.759840012 | 6.446484089  | 7.622923851 |
| 1.411087990  | 3.248450041  | 1.092790604 |
| 1.411087990  | 9.745349884  | 1.092790604 |
| 4.370088100  | 3.248450041  | 1.092790604 |
| 4.370088100  | 9.745349884  | 1.092790604 |
| 7.329088211  | 3.248450041  | 1.092790604 |
| 7.329088211  | 9.745349884  | 1.092790604 |

|              |             |              |
|--------------|-------------|--------------|
| 10.288088799 | 3.248450041 | 1.092790604  |
| 10.288088799 | 9.745349884 | 1.092790604  |
| 1.406201601  | 0.080399461 | 4.535963058  |
| 1.406437039  | 6.601039886 | 4.466053963  |
| 4.363615990  | 0.078429125 | 4.537094593  |
| 4.436130047  | 6.584348679 | 4.574210167  |
| 7.323033810  | 0.071690075 | 4.531123161  |
| 7.318918228  | 6.554780006 | 4.727749825  |
| 10.283321381 | 0.073176928 | 4.535615921  |
| 10.206973076 | 6.575311661 | 4.574614048  |
| 1.289638996  | 3.204931736 | 7.975123405  |
| 1.268400788  | 9.690368652 | 7.985065937  |
| 4.195285320  | 3.173747778 | 7.938774109  |
| 4.182021618  | 9.725150108 | 7.958056450  |
| 7.222608089  | 3.148889542 | 7.756930828  |
| 7.205194950  | 9.706836700 | 7.823035717  |
| 10.229746819 | 3.164441586 | 7.935128212  |
| 10.209855080 | 9.724175453 | 7.931260586  |
| 5.975590706  | 9.265297890 | 11.098004341 |
| 7.302803040  | 7.167369843 | 10.159626961 |
| 8.638598442  | 9.263701439 | 11.112403870 |
| 10.104324341 | 7.183987141 | 10.254800797 |
| 8.703403473  | 4.903699398 | 10.397174835 |
| 8.692232132  | 6.596412659 | 12.441754341 |
| 7.293673515  | 8.695088387 | 13.293860435 |
| 4.513172150  | 7.168300152 | 10.276315689 |
| 5.913783073  | 4.884499550 | 10.389011383 |
| 5.968334675  | 6.566865444 | 12.437314034 |



TiO2\_110\_Pd22\_1

1.0

|               |               |               |
|---------------|---------------|---------------|
| 17.7539997101 | 0.0000000000  | 0.0000000000  |
| 0.0000000000  | 19.4906997681 | 0.0000000000  |
| 0.0000000000  | 0.0000000000  | 20.1963996887 |

O Ti Pd

144 72 22

Cartesian

|              |              |             |
|--------------|--------------|-------------|
| 0.000000000  | 0.000000000  | 0.000000000 |
| 0.000000000  | 6.496835232  | 0.000000000 |
| 0.000000000  | 12.993865013 | 0.000000000 |
| 2.959059000  | 0.000000000  | 0.000000000 |
| 2.959059000  | 6.496835232  | 0.000000000 |
| 2.959059000  | 12.993865013 | 0.000000000 |
| 5.917940617  | 0.000000000  | 0.000000000 |
| 5.917940617  | 6.496835232  | 0.000000000 |
| 5.917940617  | 12.993865013 | 0.000000000 |
| 8.876999855  | 0.000000000  | 0.000000000 |
| 8.876999855  | 6.496835232  | 0.000000000 |
| 8.876999855  | 12.993865013 | 0.000000000 |
| 11.836059570 | 0.000000000  | 0.000000000 |
| 11.836059570 | 6.496835232  | 0.000000000 |
| 11.836059570 | 12.993865013 | 0.000000000 |
| 14.794939995 | 0.000000000  | 0.000000000 |
| 14.794939995 | 6.496835232  | 0.000000000 |
| 14.794939995 | 12.993865013 | 0.000000000 |
| 17.753608704 | 3.241810083  | 3.147770405 |

|              |              |             |
|--------------|--------------|-------------|
| 0.000177540  | 9.753301620  | 3.151224136 |
| 0.000124278  | 16.242029190 | 3.138742685 |
| 2.950306416  | 3.221383810  | 3.147467613 |
| 2.961882114  | 9.751392365  | 3.154879808 |
| 2.958526373  | 16.240684509 | 3.138419628 |
| 5.911407471  | 3.188483477  | 3.145467997 |
| 5.906329632  | 9.763865471  | 3.152415514 |
| 5.918171406  | 16.240665436 | 3.138520479 |
| 8.877727509  | 3.173963070  | 3.138015747 |
| 8.877887726  | 9.781602859  | 3.145690203 |
| 8.876609802  | 16.240293503 | 3.139894009 |
| 11.842024803 | 3.190393686  | 3.147406816 |
| 11.849090576 | 9.762287140  | 3.154314280 |
| 11.835651398 | 16.241678238 | 3.138823509 |
| 14.802326202 | 3.222124577  | 3.147629261 |
| 14.790874481 | 9.749111176  | 3.155970335 |
| 14.795188904 | 16.240879059 | 3.138702154 |
| 0.000000000  | 0.000000000  | 2.547977686 |
| 0.000000000  | 6.496835232  | 2.547977686 |
| 0.000000000  | 12.993865013 | 2.547977686 |
| 2.959059000  | 0.000000000  | 2.547977686 |
| 2.959059000  | 6.496835232  | 2.547977686 |
| 2.959059000  | 12.993865013 | 2.547977686 |
| 5.917940617  | 0.000000000  | 2.547977686 |
| 5.917940617  | 6.496835232  | 2.547977686 |
| 5.917940617  | 12.993865013 | 2.547977686 |
| 8.876999855  | 0.000000000  | 2.547977686 |
| 8.876999855  | 6.496835232  | 2.547977686 |

|              |              |             |
|--------------|--------------|-------------|
| 8.876999855  | 12.993865013 | 2.547977686 |
| 11.836059570 | 0.000000000  | 2.547977686 |
| 11.836059570 | 6.496835232  | 2.547977686 |
| 11.836059570 | 12.993865013 | 2.547977686 |
| 14.794939995 | 0.000000000  | 2.547977686 |
| 14.794939995 | 6.496835232  | 2.547977686 |
| 14.794939995 | 12.993865013 | 2.547977686 |
| 17.751495361 | 3.222943306  | 5.752601624 |
| 0.001136256  | 9.762540817  | 5.757448673 |
| 17.752916336 | 16.245498657 | 5.736746788 |
| 2.946595907  | 3.232902765  | 5.746905804 |
| 2.944678307  | 9.771584511  | 5.754863262 |
| 2.957869530  | 16.243412018 | 5.736726761 |
| 5.907536983  | 3.316108704  | 5.773302555 |
| 5.905566216  | 9.797662735  | 5.759346962 |
| 5.917514801  | 16.246297836 | 5.736423492 |
| 8.872809410  | 3.308117390  | 5.711461067 |
| 8.880284309  | 9.789652824  | 5.726042747 |
| 8.876307487  | 16.245536804 | 5.737190723 |
| 11.840178490 | 3.313029289  | 5.774190903 |
| 11.851770401 | 9.782831192  | 5.764678478 |
| 11.835420609 | 16.246297836 | 5.736060143 |
| 14.801456451 | 3.229141235  | 5.747875214 |
| 14.811841965 | 9.771135330  | 5.755751610 |
| 14.794425964 | 16.243705750 | 5.736646175 |
| 1.479440808  | 4.522427082  | 1.273988843 |
| 1.479440808  | 11.019262314 | 1.273988843 |
| 1.479440808  | 17.516292572 | 1.273988843 |

|              |              |             |
|--------------|--------------|-------------|
| 4.438499928  | 4.522427082  | 1.273988843 |
| 4.438499928  | 11.019262314 | 1.273988843 |
| 4.438499928  | 17.516292572 | 1.273988843 |
| 7.397559166  | 4.522427082  | 1.273988843 |
| 7.397559166  | 11.019262314 | 1.273988843 |
| 7.397559166  | 17.516292572 | 1.273988843 |
| 10.356440544 | 4.522427082  | 1.273988843 |
| 10.356440544 | 11.019262314 | 1.273988843 |
| 10.356440544 | 17.516292572 | 1.273988843 |
| 13.315500259 | 4.522427082  | 1.273988843 |
| 13.315500259 | 11.019262314 | 1.273988843 |
| 13.315500259 | 17.516292572 | 1.273988843 |
| 16.274559021 | 4.522427082  | 1.273988843 |
| 16.274559021 | 11.019262314 | 1.273988843 |
| 16.274559021 | 17.516292572 | 1.273988843 |
| 1.476085305  | 1.218051791  | 4.689603806 |
| 1.457940698  | 7.730401516  | 4.693078041 |
| 1.477470040  | 14.222109795 | 4.689382076 |
| 4.444003582  | 1.216921329  | 4.711295128 |
| 4.367661476  | 7.728588581  | 4.731874943 |
| 4.436404705  | 14.223688126 | 4.686696053 |
| 7.393457890  | 1.213861346  | 4.729633331 |
| 7.373094082  | 7.760612011  | 4.570122242 |
| 7.397150517  | 14.221758842 | 4.689422131 |
| 10.358251572 | 1.215186596  | 4.729996681 |
| 10.380728722 | 7.760046482  | 4.569374561 |
| 10.358304977 | 14.220901489 | 4.689725399 |
| 13.306142807 | 1.215284109  | 4.711617947 |

|              |              |             |
|--------------|--------------|-------------|
| 13.385219574 | 7.722858429  | 4.744134426 |
| 13.317771912 | 14.221993446 | 4.687523842 |
| 16.274665833 | 1.217428088  | 4.690189362 |
| 16.293964386 | 7.730499268  | 4.692956448 |
| 16.275091171 | 14.220960617 | 4.689280510 |
| 1.479440808  | 1.974407911  | 1.273988843 |
| 1.479440808  | 8.471437454  | 1.273988843 |
| 1.479440808  | 14.968273163 | 1.273988843 |
| 4.438499928  | 1.974407911  | 1.273988843 |
| 4.438499928  | 8.471437454  | 1.273988843 |
| 4.438499928  | 14.968273163 | 1.273988843 |
| 7.397559166  | 1.974407911  | 1.273988843 |
| 7.397559166  | 8.471437454  | 1.273988843 |
| 7.397559166  | 14.968273163 | 1.273988843 |
| 10.356440544 | 1.974407911  | 1.273988843 |
| 10.356440544 | 8.471437454  | 1.273988843 |
| 10.356440544 | 14.968273163 | 1.273988843 |
| 13.315500259 | 1.974407911  | 1.273988843 |
| 13.315500259 | 8.471437454  | 1.273988843 |
| 13.315500259 | 14.968273163 | 1.273988843 |
| 16.274559021 | 1.974407911  | 1.273988843 |
| 16.274559021 | 8.471437454  | 1.273988843 |
| 16.274559021 | 14.968273163 | 1.273988843 |
| 1.455224276  | 5.260871410  | 4.705357075 |
| 1.477239251  | 11.772246361 | 4.682515144 |
| 1.482068300  | 18.263467789 | 4.684635639 |
| 4.381260872  | 5.217582226  | 4.573272705 |
| 4.431966305  | 11.777508736 | 4.691522598 |

|              |              |             |
|--------------|--------------|-------------|
| 4.436866760  | 18.261577606 | 4.682555199 |
| 7.382202148  | 5.193861961  | 4.460899830 |
| 7.393706322  | 11.778406143 | 4.678233624 |
| 7.400453091  | 18.262376785 | 4.682979584 |
| 10.371691704 | 5.194583416  | 4.464777470 |
| 10.362868309 | 11.776943207 | 4.678677559 |
| 10.351256371 | 18.262065887 | 4.682838440 |
| 13.371230125 | 5.218517780  | 4.582441807 |
| 13.322245598 | 11.773824692 | 4.692552567 |
| 13.314612389 | 18.260915756 | 4.682010174 |
| 16.296483994 | 5.260364532  | 4.705862045 |
| 16.276903152 | 11.770765305 | 4.682979584 |
| 16.269853592 | 18.262706757 | 4.683504581 |
| 0.000000000  | 3.248514891  | 1.273988843 |
| 0.000000000  | 9.745349884  | 1.273988843 |
| 0.000000000  | 16.242183685 | 1.273988843 |
| 2.959059000  | 3.248514891  | 1.273988843 |
| 2.959059000  | 9.745349884  | 1.273988843 |
| 2.959059000  | 16.242183685 | 1.273988843 |
| 5.917940617  | 3.248514891  | 1.273988843 |
| 5.917940617  | 9.745349884  | 1.273988843 |
| 5.917940617  | 16.242183685 | 1.273988843 |
| 8.876999855  | 3.248514891  | 1.273988843 |
| 8.876999855  | 9.745349884  | 1.273988843 |
| 8.876999855  | 16.242183685 | 1.273988843 |
| 11.836059570 | 3.248514891  | 1.273988843 |
| 11.836059570 | 9.745349884  | 1.273988843 |
| 11.836059570 | 16.242183685 | 1.273988843 |

|              |              |             |
|--------------|--------------|-------------|
| 14.794939995 | 3.248514891  | 1.273988843 |
| 14.794939995 | 9.745349884  | 1.273988843 |
| 14.794939995 | 16.242183685 | 1.273988843 |
| 17.752792358 | 19.486061096 | 4.362684727 |
| 17.753253937 | 6.502701759  | 4.364159107 |
| 17.753839493 | 12.991953850 | 4.362402439 |
| 2.954904795  | 0.002046523  | 4.363189697 |
| 2.932818651  | 6.476077080  | 4.365270138 |
| 2.954620600  | 12.996905327 | 4.362624168 |
| 5.912490368  | 19.477251053 | 4.362220287 |
| 5.922255039  | 6.426239967  | 4.444177151 |
| 5.915810108  | 12.996905327 | 4.363331318 |
| 8.876715660  | 19.481033325 | 4.363351345 |
| 8.874425888  | 6.438460350  | 4.427010536 |
| 8.877851486  | 12.991662979 | 4.361715317 |
| 11.839059830 | 19.476665497 | 4.362583637 |
| 11.826932907 | 6.432729721  | 4.442157745 |
| 11.839237213 | 12.994625092 | 4.362906933 |
| 14.796432495 | 19.490446091 | 4.362563610 |
| 14.819245338 | 6.475336552  | 4.363593578 |
| 14.798491478 | 12.994585991 | 4.363997459 |
| 1.479440808  | 0.000000000  | 1.273988843 |
| 1.479440808  | 6.496835232  | 1.273988843 |
| 1.479440808  | 12.993865013 | 1.273988843 |
| 4.438499928  | 0.000000000  | 1.273988843 |
| 4.438499928  | 6.496835232  | 1.273988843 |
| 4.438499928  | 12.993865013 | 1.273988843 |
| 7.397559166  | 0.000000000  | 1.273988843 |

|              |              |             |
|--------------|--------------|-------------|
| 7.397559166  | 6.496835232  | 1.273988843 |
| 7.397559166  | 12.993865013 | 1.273988843 |
| 10.356440544 | 0.000000000  | 1.273988843 |
| 10.356440544 | 6.496835232  | 1.273988843 |
| 10.356440544 | 12.993865013 | 1.273988843 |
| 13.315500259 | 0.000000000  | 1.273988843 |
| 13.315500259 | 6.496835232  | 1.273988843 |
| 13.315500259 | 12.993865013 | 1.273988843 |
| 16.274559021 | 0.000000000  | 1.273988843 |
| 16.274559021 | 6.496835232  | 1.273988843 |
| 16.274559021 | 12.993865013 | 1.273988843 |
| 1.462769866  | 3.247072458  | 4.663934231 |
| 1.465361953  | 9.739327431  | 4.665893078 |
| 1.477789640  | 16.240879059 | 4.658824444 |
| 4.396955490  | 3.236898422  | 4.642950535 |
| 4.390599728  | 9.753926277  | 4.641031742 |
| 4.436032295  | 16.238403320 | 4.658077240 |
| 7.374514580  | 3.219122887  | 4.585249424 |
| 7.375206470  | 9.748761177  | 4.579977989 |
| 7.396653652  | 16.235227585 | 4.658501625 |
| 10.370342255 | 3.221325159  | 4.587289333 |
| 10.387244225 | 9.746753693  | 4.582179070 |
| 10.355197906 | 16.234212875 | 4.658481121 |
| 13.345823288 | 3.236527920  | 4.644949913 |
| 13.366293907 | 9.746772766  | 4.645212173 |
| 13.315535545 | 16.237234116 | 4.657673359 |
| 16.280719757 | 3.245143175  | 4.664741993 |
| 16.290697098 | 9.738293648  | 4.665429115 |



|              |              |              |
|--------------|--------------|--------------|
| 16.273937225 | 16.239515305 | 4.658723831  |
| 8.894008636  | 9.336239815  | 7.766263008  |
| 11.560801506 | 4.608946323  | 7.514898300  |
| 8.855570793  | 6.789994717  | 9.113181114  |
| 6.119892120  | 4.682192326  | 7.481958389  |
| 11.550344467 | 9.119814873  | 7.782218456  |
| 6.237104416  | 9.187311172  | 7.785227299  |
| 11.593432426 | 6.712810993  | 9.193784714  |
| 8.840479851  | 4.671141148  | 7.457116604  |
| 8.881935120  | 8.861154556  | 12.333759308 |
| 6.117069244  | 6.781145573  | 9.178859711  |
| 12.923847198 | 6.905477047  | 6.876894474  |
| 10.274506569 | 8.952331543  | 10.079841614 |
| 7.543656826  | 7.023395538  | 6.756886959  |
| 10.115678787 | 2.500520229  | 8.511974335  |
| 10.177941322 | 6.661901474  | 11.520672798 |
| 7.500478745  | 4.588305950  | 10.053848267 |
| 10.194293022 | 6.985876083  | 6.759512424  |
| 7.499875069  | 8.989734650  | 10.075862885 |
| 4.810890198  | 7.006087780  | 6.859464645  |
| 10.155483246 | 4.542346478  | 10.051162720 |
| 7.493448734  | 2.549344540  | 8.514479637  |
| 7.514913082  | 6.703494549  | 11.525601387 |

**TiO2\_110\_Pd22\_2**

1.0

|               |               |              |
|---------------|---------------|--------------|
| 17.7539997101 | 0.0000000000  | 0.0000000000 |
| 0.0000000000  | 19.4906997681 | 0.0000000000 |

|              |              |             |               |
|--------------|--------------|-------------|---------------|
|              | 0.000000000  | 0.000000000 | 20.1963996887 |
| O            | Ti           | Pd          |               |
| 144          | 72           | 22          |               |
| Cartesian    |              |             |               |
| 0.000000000  | 0.000000000  | 0.000000000 |               |
| 0.000000000  | 6.496835232  | 0.000000000 |               |
| 0.000000000  | 12.993865013 | 0.000000000 |               |
| 2.959059000  | 0.000000000  | 0.000000000 |               |
| 2.959059000  | 6.496835232  | 0.000000000 |               |
| 2.959059000  | 12.993865013 | 0.000000000 |               |
| 5.917940617  | 0.000000000  | 0.000000000 |               |
| 5.917940617  | 6.496835232  | 0.000000000 |               |
| 5.917940617  | 12.993865013 | 0.000000000 |               |
| 8.876999855  | 0.000000000  | 0.000000000 |               |
| 8.876999855  | 6.496835232  | 0.000000000 |               |
| 8.876999855  | 12.993865013 | 0.000000000 |               |
| 11.836059570 | 0.000000000  | 0.000000000 |               |
| 11.836059570 | 6.496835232  | 0.000000000 |               |
| 11.836059570 | 12.993865013 | 0.000000000 |               |
| 14.794939995 | 0.000000000  | 0.000000000 |               |
| 14.794939995 | 6.496835232  | 0.000000000 |               |
| 14.794939995 | 12.993865013 | 0.000000000 |               |
| 17.753129959 | 3.248261452  | 3.149588108 |               |
| 17.746648788 | 9.746753693  | 3.155808687 |               |
| 17.753414154 | 16.242534637 | 3.137450218 |               |
| 2.958278179  | 3.240036488  | 3.150517225 |               |
| 2.955224276  | 9.751469612  | 3.150496960 |               |
| 2.956165314  | 16.240314484 | 3.137914658 |               |

|              |              |             |
|--------------|--------------|-------------|
| 5.909862995  | 3.221383810  | 3.153910160 |
| 5.908584595  | 9.769440651  | 3.153284073 |
| 5.915525913  | 16.243900299 | 3.137975454 |
| 8.864997864  | 3.212320566  | 3.131774902 |
| 8.856565475  | 9.788560867  | 3.129876375 |
| 8.878011703  | 16.240371704 | 3.138823509 |
| 11.850244522 | 3.216336012  | 3.141489267 |
| 11.845451355 | 9.780744553  | 3.137308836 |
| 11.835260391 | 16.243822098 | 3.138783216 |
| 14.797284126 | 3.229570150  | 3.155041218 |
| 14.802237511 | 9.774761200  | 3.163099527 |
| 14.795188904 | 16.240392685 | 3.137167215 |
| 0.000000000  | 0.000000000  | 2.547977686 |
| 0.000000000  | 6.496835232  | 2.547977686 |
| 0.000000000  | 12.993865013 | 2.547977686 |
| 2.959059000  | 0.000000000  | 2.547977686 |
| 2.959059000  | 6.496835232  | 2.547977686 |
| 2.959059000  | 12.993865013 | 2.547977686 |
| 5.917940617  | 0.000000000  | 2.547977686 |
| 5.917940617  | 6.496835232  | 2.547977686 |
| 5.917940617  | 12.993865013 | 2.547977686 |
| 8.876999855  | 0.000000000  | 2.547977686 |
| 8.876999855  | 6.496835232  | 2.547977686 |
| 8.876999855  | 12.993865013 | 2.547977686 |
| 11.836059570 | 0.000000000  | 2.547977686 |
| 11.836059570 | 6.496835232  | 2.547977686 |
| 11.836059570 | 12.993865013 | 2.547977686 |
| 14.794939995 | 0.000000000  | 2.547977686 |

|              |              |             |
|--------------|--------------|-------------|
| 14.794939995 | 6.496835232  | 2.547977686 |
| 14.794939995 | 12.993865013 | 2.547977686 |
| 0.000124278  | 3.238827944  | 5.754842758 |
| 17.745300293 | 9.756011009  | 5.762032509 |
| 17.751230240 | 16.243158340 | 5.735393524 |
| 2.945139885  | 3.234968901  | 5.751348972 |
| 2.934434175  | 9.756850243  | 5.751530647 |
| 2.954442978  | 16.240547180 | 5.735877991 |
| 5.886924267  | 3.248300552  | 5.790307999 |
| 5.876307964  | 9.776165009  | 5.785379410 |
| 5.914425373  | 16.245166779 | 5.736161232 |
| 8.882734299  | 3.155076265  | 5.681893349 |
| 8.868673325  | 9.802379608  | 5.690295219 |
| 8.874709129  | 16.241092682 | 5.737655640 |
| 11.838242531 | 3.246156454  | 5.736524582 |
| 11.821873665 | 9.809045792  | 5.711238861 |
| 11.835633278 | 16.245439529 | 5.736868382 |
| 14.801260948 | 3.273774862  | 5.768233299 |
| 14.780701637 | 9.664522171  | 5.805596352 |
| 14.794301033 | 16.240041733 | 5.735171795 |
| 1.479440808  | 4.522427082  | 1.273988843 |
| 1.479440808  | 11.019262314 | 1.273988843 |
| 1.479440808  | 17.516292572 | 1.273988843 |
| 4.438499928  | 4.522427082  | 1.273988843 |
| 4.438499928  | 11.019262314 | 1.273988843 |
| 4.438499928  | 17.516292572 | 1.273988843 |
| 7.397559166  | 4.522427082  | 1.273988843 |
| 7.397559166  | 11.019262314 | 1.273988843 |

|              |              |             |
|--------------|--------------|-------------|
| 7.397559166  | 17.516292572 | 1.273988843 |
| 10.356440544 | 4.522427082  | 1.273988843 |
| 10.356440544 | 11.019262314 | 1.273988843 |
| 10.356440544 | 17.516292572 | 1.273988843 |
| 13.315500259 | 4.522427082  | 1.273988843 |
| 13.315500259 | 11.019262314 | 1.273988843 |
| 13.315500259 | 17.516292572 | 1.273988843 |
| 16.274559021 | 4.522427082  | 1.273988843 |
| 16.274559021 | 11.019262314 | 1.273988843 |
| 16.274559021 | 17.516292572 | 1.273988843 |
| 1.475037813  | 1.226140380  | 4.685382843 |
| 1.472765207  | 7.726366520  | 4.696046829 |
| 1.468823910  | 14.215756416 | 4.689664841 |
| 4.435339928  | 1.220975399  | 4.694390774 |
| 4.413448811  | 7.731492996  | 4.687826633 |
| 4.428557873  | 14.222207069 | 4.685585022 |
| 7.379112720  | 1.217096686  | 4.693683624 |
| 7.364553928  | 7.761137962  | 4.596720695 |
| 7.388256073  | 14.227645874 | 4.681687355 |
| 10.367465973 | 1.217135787  | 4.675547123 |
| 10.331354141 | 7.775717258  | 4.551319122 |
| 10.358997345 | 14.223397255 | 4.689321518 |
| 13.319689751 | 1.222846508  | 4.704145432 |
| 13.345503807 | 7.757824898  | 4.582340717 |
| 13.313707352 | 14.221740723 | 4.683969021 |
| 16.273315430 | 1.228128433  | 4.694269180 |
| 16.296627045 | 7.728705883  | 4.689321518 |
| 16.276140213 | 14.219108582 | 4.684231758 |

|              |              |             |
|--------------|--------------|-------------|
| 1.479440808  | 1.974407911  | 1.273988843 |
| 1.479440808  | 8.471437454  | 1.273988843 |
| 1.479440808  | 14.968273163 | 1.273988843 |
| 4.438499928  | 1.974407911  | 1.273988843 |
| 4.438499928  | 8.471437454  | 1.273988843 |
| 4.438499928  | 14.968273163 | 1.273988843 |
| 7.397559166  | 1.974407911  | 1.273988843 |
| 7.397559166  | 8.471437454  | 1.273988843 |
| 7.397559166  | 14.968273163 | 1.273988843 |
| 10.356440544 | 1.974407911  | 1.273988843 |
| 10.356440544 | 8.471437454  | 1.273988843 |
| 10.356440544 | 14.968273163 | 1.273988843 |
| 13.315500259 | 1.974407911  | 1.273988843 |
| 13.315500259 | 8.471437454  | 1.273988843 |
| 13.315500259 | 14.968273163 | 1.273988843 |
| 16.274559021 | 1.974407911  | 1.273988843 |
| 16.274559021 | 8.471437454  | 1.273988843 |
| 16.274559021 | 14.968273163 | 1.273988843 |
| 1.477949500  | 5.266191959  | 4.695016384 |
| 1.471771002  | 11.764780998 | 4.684635639 |
| 1.475730300  | 18.265514374 | 4.686837196 |
| 4.410803795  | 5.259389400  | 4.680676937 |
| 4.427279472  | 11.772987366 | 4.691219807 |
| 4.429338932  | 18.261907578 | 4.685605049 |
| 7.373484612  | 5.231693745  | 4.584622860 |
| 7.385095596  | 11.782421112 | 4.700590611 |
| 7.399192333  | 18.262279510 | 4.681747437 |
| 10.337302208 | 5.226275444  | 4.564022541 |

|              |              |             |
|--------------|--------------|-------------|
| 10.347617149 | 11.782225609 | 4.672295570 |
| 10.352446556 | 18.264617920 | 4.688149929 |
| 13.360914230 | 5.250502586  | 4.647130966 |
| 13.327572823 | 11.771661758 | 4.701661110 |
| 13.320773125 | 18.262454987 | 4.683444023 |
| 16.290822983 | 5.267088413  | 4.689563751 |
| 16.262556076 | 11.763280869 | 4.713152885 |
| 16.273723602 | 18.265436172 | 4.685403347 |
| 0.000000000  | 3.248514891  | 1.273988843 |
| 0.000000000  | 9.745349884  | 1.273988843 |
| 0.000000000  | 16.242183685 | 1.273988843 |
| 2.959059000  | 3.248514891  | 1.273988843 |
| 2.959059000  | 9.745349884  | 1.273988843 |
| 2.959059000  | 16.242183685 | 1.273988843 |
| 5.917940617  | 3.248514891  | 1.273988843 |
| 5.917940617  | 9.745349884  | 1.273988843 |
| 5.917940617  | 16.242183685 | 1.273988843 |
| 8.876999855  | 3.248514891  | 1.273988843 |
| 8.876999855  | 9.745349884  | 1.273988843 |
| 8.876999855  | 16.242183685 | 1.273988843 |
| 11.836059570 | 3.248514891  | 1.273988843 |
| 11.836059570 | 9.745349884  | 1.273988843 |
| 11.836059570 | 16.242183685 | 1.273988843 |
| 14.794939995 | 3.248514891  | 1.273988843 |
| 14.794939995 | 9.745349884  | 1.273988843 |
| 14.794939995 | 16.242183685 | 1.273988843 |
| 17.751852036 | 0.001754163  | 4.364340782 |
| 17.751443863 | 6.489545345  | 4.362483025 |

|              |              |             |
|--------------|--------------|-------------|
| 17.750112534 | 12.987335205 | 4.365411282 |
| 2.954230070  | 0.000350833  | 4.363977432 |
| 2.959041357  | 6.501162052  | 4.362826347 |
| 2.951602459  | 12.992052078 | 4.363512993 |
| 5.911549091  | 19.479084015 | 4.361836433 |
| 5.917336941  | 6.482879639  | 4.398715019 |
| 5.908033848  | 12.999108315 | 4.362280846 |
| 8.876094818  | 0.006802254  | 4.361230850 |
| 8.872774124  | 6.518196583  | 4.420628071 |
| 8.872330666  | 13.007664680 | 4.361614227 |
| 11.837639809 | 19.482181549 | 4.362422466 |
| 11.832578659 | 6.485589027  | 4.504766464 |
| 11.834904671 | 12.991292000 | 4.362806320 |
| 14.798455238 | 0.000389814  | 4.364260197 |
| 14.787004471 | 6.513850212  | 4.365431786 |
| 14.794852257 | 13.001504898 | 4.364058018 |
| 1.479440808  | 0.000000000  | 1.273988843 |
| 1.479440808  | 6.496835232  | 1.273988843 |
| 1.479440808  | 12.993865013 | 1.273988843 |
| 4.438499928  | 0.000000000  | 1.273988843 |
| 4.438499928  | 6.496835232  | 1.273988843 |
| 4.438499928  | 12.993865013 | 1.273988843 |
| 7.397559166  | 0.000000000  | 1.273988843 |
| 7.397559166  | 6.496835232  | 1.273988843 |
| 7.397559166  | 12.993865013 | 1.273988843 |
| 10.356440544 | 0.000000000  | 1.273988843 |
| 10.356440544 | 6.496835232  | 1.273988843 |
| 10.356440544 | 12.993865013 | 1.273988843 |



|              |              |             |
|--------------|--------------|-------------|
| 13.315500259 | 0.000000000  | 1.273988843 |
| 13.315500259 | 6.496835232  | 1.273988843 |
| 13.315500259 | 12.993865013 | 1.273988843 |
| 16.274559021 | 0.000000000  | 1.273988843 |
| 16.274559021 | 6.496835232  | 1.273988843 |
| 16.274559021 | 12.993865013 | 1.273988843 |
| 1.465060115  | 3.255239248  | 4.662823677 |
| 1.451105475  | 9.735000610  | 4.662278175 |
| 1.476085305  | 16.241035461 | 4.658481121 |
| 4.393032074  | 3.245825052  | 4.654058456 |
| 4.381172180  | 9.738918304  | 4.653755188 |
| 4.434434414  | 16.240800858 | 4.659047127 |
| 7.358731270  | 3.246780396  | 4.602759361 |
| 7.340320110  | 9.756615639  | 4.596155643 |
| 7.394771576  | 16.245166779 | 4.658501625 |
| 10.370466232 | 3.250093699  | 4.544472694 |
| 10.345628738 | 9.751021385  | 4.531688213 |
| 10.354328156 | 16.244035721 | 4.659794331 |
| 13.356990814 | 3.241245031  | 4.634790897 |
| 13.339840889 | 9.748624802  | 4.624510765 |
| 13.313689232 | 16.241678238 | 4.658441067 |
| 16.286880493 | 3.260053396  | 4.669367313 |
| 16.271505356 | 9.737865448  | 4.683484554 |
| 16.272552490 | 16.243236542 | 4.657612801 |
| 6.736258030  | 6.643814564  | 7.509243488 |
| 11.390628815 | 9.475715637  | 7.716115475 |
| 9.994685173  | 6.701955318  | 9.509859085 |
| 11.487778664 | 4.031865597  | 7.644438267 |

|              |              |              |
|--------------|--------------|--------------|
| 6.556765079  | 9.265430450  | 7.732575417  |
| 6.626857758  | 4.015025616  | 7.634380341  |
| 9.866909027  | 9.379548073  | 9.933699608  |
| 11.539922714 | 6.754658222  | 7.118200779  |
| 8.518919945  | 6.601149082  | 11.832344055 |
| 9.974197388  | 4.054182529  | 9.915362358  |
| 8.929267883  | 10.585710526 | 7.817562103  |
| 7.607571125  | 8.055331230  | 9.787922859  |
| 9.113625526  | 5.439016342  | 7.250346184  |
| 13.778488159 | 8.201998711  | 7.564177990  |
| 10.795460701 | 8.001653671  | 11.926923752 |
| 12.389308929 | 5.453614712  | 9.766675949  |
| 9.063949585  | 8.024028778  | 7.365142345  |
| 7.651388168  | 5.238944054  | 9.698533058  |
| 9.054823875  | 2.886689425  | 7.802818298  |
| 12.336367607 | 8.037165642  | 9.775401115  |
| 13.801391602 | 5.445682049  | 7.559895992  |
| 10.907738686 | 5.400444031  | 11.939626694 |
